1 **Probing differences in gene essentiality between the human and animal adapted**  
2 **lineages of the *Mycobacterium tuberculosis* complex using TnSeq**

3 Amanda J Gibson<sup>1,5\*</sup>, Ian J Passmore<sup>2</sup>, Valwynne Faulkner<sup>1,6\*</sup>, Dong Xia<sup>1</sup>, Irene Nobeli<sup>3</sup>,  
4 Jennifer Stiens<sup>3</sup>, Sam Willcocks<sup>2</sup>, Dirk Werling<sup>1</sup>, Bernardo Villarreal-Ramos<sup>4,5\*</sup>, Brendan  
5 W Wren<sup>3</sup>, Sharon L Kendall<sup>1\*\*</sup>

6 <sup>1</sup>Centre for Emerging, Endemic and Exotic Diseases, Pathobiology and Population Sciences, Royal Veterinary College,  
7 Hawkshead Lane, North Mymms, Hatfield, AL9 7TA

8 <sup>2</sup> London School of Hygiene and Tropical Medicine, Keppel Street, London, WC1E 7HT

9 <sup>3</sup> Institute of Structural and Molecular Biology, Biological Sciences, Birkbeck, University of London, Malet Street,  
10 London, WC1E 7HX

11 <sup>4</sup> Animal and Plant Health Agency, Woodham Ln, Addlestone, Surrey, KT15 3NB

12 <sup>5</sup> Centre of Excellence for Bovine Tuberculosis, IBERS, Aberystwyth University, Penglais, Aberystwyth, Ceredigion,  
13 SY23 3EE

14 <sup>6</sup> Systems Chemical Biology of Infection and Resistance Laboratory, The Francis Crick Institute, 1 Midland Road, London  
15 NW1 1AT

16  
17 \*present address

18  
19  
20 \*\* corresponding author

21  
22

## 23 Abstract

24 Members of the Mycobacterium tuberculosis complex (MTBC) show distinct host  
25 adaptations, preferences and phenotypes despite being >99% identical at the nucleic acid  
26 level. Previous studies have explored gene expression changes between the members,  
27 however few studies have probed differences in gene essentiality. To better understand  
28 the functional impacts of the nucleic acid differences between *Mycobacterium bovis* and  
29 *Mycobacterium tuberculosis* we used the Mycomar T7 phagemid delivery system to  
30 generate whole genome transposon libraries in laboratory strains of both species and  
31 compared the essentiality status of genes during growth under identical *in vitro*  
32 conditions. Libraries contained insertions in 54% of possible TA sites in *M. bovis* and 40%  
33 of those present in *M. tuberculosis*, achieving similar saturation levels to those previously  
34 reported for the MTBC. The distributions of essentiality across the functional categories  
35 were similar in both species. 527 genes were found to be essential in *M. bovis* whereas  
36 477 genes were essential in *M. tuberculosis* and 370 essential genes were common in both  
37 species. CRISPRi was successfully utilised in both species to determine the impacts of  
38 silencing genes including *wag31*, a gene involved in peptidoglycan synthesis and  
39 *Rv2182c/Mb2204c*, a gene involved in glycerophospholipid metabolism. We observed  
40 species specific differences in the response to gene silencing, with the inhibition of  
41 expression of *Mb2204c* in *M. bovis* showing significantly less growth impact than silencing  
42 its ortholog (*Rv2182c*) in *M. tuberculosis*. Given that glycerophospholipid metabolism is a  
43 validated pathway for antimicrobials, our observations suggest that target vulnerability  
44 in the animal adapted lineages cannot be assumed to be the same as the human  
45 counterpart. This is of relevance for zoonotic tuberculosis as it implies that the  
46 development of antimicrobials targeting the human adapted lineage might not  
47 necessarily be effective against the animal adapted lineage. The generation of a  
48 transposon library and the first reported utilisation of CRISPRi in *M. bovis* will enable the  
49 use of these tools to further probe the genetic basis of survival under disease relevant  
50 conditions.

51

## 52 Introduction

53 *Mycobacterium bovis* and *Mycobacterium tuberculosis* are closely related members  
54 of the *Mycobacterium tuberculosis* complex (MTBC). Although both species are >99%  
55 identical at the nucleotide level each species shows distinct host tropisms. *M. bovis*, the  
56 animal adapted species, is the main causative agent of bovine tuberculosis in cattle (1)  
57 while *M. tuberculosis* is the main cause of human tuberculosis (TB) and is responsible for  
58 ~1.5 million deaths annually (1,2). *M. bovis* exhibits a broader host range than  
59 *M. tuberculosis* and is also able to cause TB in humans through zoonotic transfer,  
60 representing a serious public health risk in countries without a control programme in  
61 domestic livestock (2,3). The WHO recognises that zoonotic transfer of tuberculosis  
62 threatens the delivery of the end TB strategy, highlighting the importance of  
63 understanding the differences between the two species (3).

64 Many studies have explored the genotypic and phenotypic differences between  
65 *M. tuberculosis* and *M. bovis* in order to better understand host preference. Genome  
66 sequencing of the reference strains (H37Rv and AF2122/97) showed that the main  
67 genetic differences between these pathogens were several large-scale deletions, or  
68 regions of difference (RD), and over 2,000 single-nucleotide polymorphisms (SNPs) (4–  
69 7). More recently, studies that include clinically circulating strains have confirmed that  
70 all animal adapted lineages share deletions RD7, 8, 9, and 10 (8). Transcriptomic studies  
71 which have measured significant changes in gene expression between H37Rv and  
72 AF2122/97 have provided a functional insight into the impacts of some of these  
73 polymorphisms (9–11). For instance, a SNP in *rskA* (*Mb0452c*) an anti-sigma factor in  
74 *M. bovis*, prevents repression of *sigK* activity, leading to constitutively high levels of  
75 expression of *mpb70* and *mpb83*, genes that encode key immunogenic antigens; MPB70  
76 and MPB83 (12,13). Recent studies have shown that MPB70 mediates multi-nucleated  
77 giant cell formation in *M. bovis* infected bovine macrophages, but not in *M. bovis* (or  
78 *M. tuberculosis*) infected human macrophages, providing insight into bacterial effectors  
79 of the species-specific response (14). Transcriptomic studies have also indicated a  
80 differential response to *in vitro* mimics of host stresses such as acid shock and highlight  
81 the impact of SNPs in the signalling and response regulons in two-component systems  
82 such as PhoPR and DosSRT (15–18).

83           Genome-wide transposon mutagenesis coupled with next-generation sequencing  
84 (TnSeq) has allowed genome wide predictions of gene essentiality in *M. tuberculosis* (19–  
85 24). These studies have provided information on the genetic requirements for *in vitro*  
86 growth under a number of conditions and also for growth in disease relevant models such  
87 as macrophages (20). Most of these studies performed in the MTBC have used strain  
88 H37Rv. More recently Tnseq of different clinical strains of *M. tuberculosis* has shown that  
89 there are strain specific differences in fitness associated with Tn insertions in certain  
90 genes. The implication of this observation is that different strains can show different  
91 antibiotic sensitivities as a result (25). To date, there has been a single reported Tnseq  
92 study performed in *M. bovis* (AF2122/97) which focused on intra-cellular genetic  
93 requirements (26)

94           A direct comparison of gene essentiality in *M. bovis* and *M. tuberculosis* has not  
95 been reported. Therefore, we created dense transposon libraries in both *M. bovis*  
96 (AF2122/97) and *M. tuberculosis* (H37Rv) generated on the same medium to enable  
97 direct comparisons between the two related species. We identified that there are key  
98 differences in essentiality in *M. bovis* compared to *M. tuberculosis*. We used CRISPRi to  
99 directly demonstrate that silencing the expression of a gene annotated to be involved in  
100 glycerophospholipid metabolism has different impacts on growth in the two species. This  
101 has implications for target discovery programmes as it implies that inhibition of  
102 therapeutically relevant pathways may have different impacts in the different species.  
103 This is important in the context of zoonotic tuberculosis.

104

## 105 **Materials and Methods**

### 106 **Bacterial Strains and Culture Methods**

107 *M. bovis* AF2122/97 was maintained on modified Middlebrook 7H11 solid  
108 medium containing 0.5% lysed defibrinated sheep blood, 10% heat inactivated foetal  
109 bovine serum and 10% oleic acid-albumin-dextrose-catalase (OADC) (27). Liquid  
110 cultures of *M. bovis* were grown in Middlebrook 7H9 medium containing 75 mM sodium  
111 pyruvate, 0.05% Tween<sup>®</sup>80 and 10% albumin-dextrose-catalase (ADC). *M. tuberculosis*  
112 H37Rv and *Mycobacterium smegmatis* mc<sup>2</sup>155 were maintained on Middlebrook 7H11  
113 solid medium supplemented with 0.5% glycerol and 10% OADC. Liquid cultures were  
114 grown in Middlebrook 7H9 medium supplemented with 0.2% glycerol, 0.05% Tween<sup>®</sup>80  
115 and 10% ADC unless stated otherwise. MycomarT7 Phagemid was propagated on *M.*  
116 *smegmatis* mc<sup>2</sup>155 lawns grown on Middlebrook 7H10 solid medium supplemented with  
117 0.5% glycerol and 10% OADC in a 0.6% agar overlay. The strains and plasmids used or  
118 made in this study are given in Table 1.

### 119 **Generation of Transposon Libraries**

120 Transposon libraries in *M. bovis* (AF2122/97) and *M. tuberculosis* (H37Rv) were  
121 generated using the previously described MycomarT7 phagemid system as per Majumdar  
122 *et al* with modifications (28). Briefly, 50 ml cultures of *M. bovis* and *M. tuberculosis* at  
123 OD<sub>600</sub> ≈ 1 were washed twice with MP buffer (50 mM Tris-HCl, pH 7.5, 150 mM NaCl,  
124 10 mM MgSO<sub>4</sub> and 2 mM CaCl<sub>2</sub>) at 37 °C, and then incubated with ~ 10<sup>11</sup> pfu of  
125 φMycoMarT7 phage for 16-18 h at 37 °C without rolling. Transduced bacteria were  
126 washed in pre-warmed PBS + 0.05% Tween<sup>®</sup>80 to remove extra-cellular phage and  
127 plated on Middlebrook 7H11 solid medium containing 0.5% lysed defibrinated sheep  
128 blood, 10% heat inactivated foetal bovine serum, 10% OADC, 25 µg/ml kanamycin and  
129 0.05% Tween<sup>®</sup>80. Cultures were allowed to grow for 5-6 weeks. Concurrent CFU plating  
130 was performed to estimate transduction efficiency. Approximately 15-20 colonies from  
131 each library were used for validation of random insertion using a nested PCR strategy  
132 followed by Sanger sequencing, method and data are shown in Supplementary File S1.  
133 Libraries were scraped from the plates and incubated in liquid medium at 37°C with  
134 hourly vortexing for 3 h to homogenise. Homogenised mutants were distributed to  
135 cryovials and stored at -80°C for further selection or gDNA extraction.

## 136 **DNA Extraction**

137 Unless stated otherwise, reagents were acquired from Sigma Aldrich. Genomic  
138 DNA from harvested libraries was isolated by a bead beating procedure (mechanical  
139 lysis) or using de-lipidation followed by enzymatic lysis as previously described by Long  
140 *et al* 2015 (29) and Belisle *et al* 2009 (30). Briefly, for mechanical lysis, library aliquots  
141 were disrupted using 0.1 mm glass beads and bead-beating by 3 X 15 sec bursts (5000  
142 rpm) interspersed with 2 min on ice using a beat-beater (Biospec). For enzymatic lysis,  
143 libraries were de-lipidated with equal volumes chloroform-methanol (2:1) for 1 h with  
144 agitation every 15 min, suspension was centrifuged at 3,488 x g for 10 min the bacterial  
145 pellet allowed to dry for 2 h after removal of both solvent layers. De-lipidated bacteria  
146 were suspended in TE buffer and incubated with 100 µg/ml lysozyme in the presence of  
147 100 mM TrisBase (pH 9.0) at 37°C for 12-16 h. Bacterial lysis was completed by  
148 incubating for 3 h at 55°C in the presence of 1% SDS and 100 µg/ml proteinase K (NEB).  
149 Lysates from both methods were extracted twice with equal volumes of phenol-  
150 chloroform-isoamyl alcohol (25:24:1). The aqueous layer was harvested by  
151 centrifugation at 12,000 x g for 30 min and DNA was precipitated with 0.1 volumes of 3M  
152 sodium acetate (pH 5.2) and one volume of ice-cold isopropanol overnight at -20°C. DNA  
153 pellets were washed several times in ethanol. DNA was re-suspended in water and  
154 quantity and quality were determined using a DeNovix Spectrophotometer (DeNovix Inc,  
155 USA), agarose gel electrophoresis and fluorometry using Qubit4 (Invitrogen).

## 156 **Library Preparation for Transposon Directed Inserted Sequencing**

157 2 µg of extracted DNA libraries were resuspended in purified water and sheared  
158 to approximately 550 bp fragments using a S220 focussed-ultrasonicator (Covaris),  
159 according to the manufacturer's protocol. Sheared DNA was repaired using NEBNext  
160 blunt-end repair kit (New England Biolabs) and purified using Monarch PCR clean-up kit  
161 (New England Biolabs). Blunted DNA was A-tailed using NEBNext dA-tailing kit and  
162 column-purified. Custom transposon sequencing adaptors, or "TraDIS tags", (Table 2)  
163 were generated by heating an equimolar mix of adaptor standard primer and adaptor  
164 P7+index to 95°C for 7 min and then allowed to cool to room temperature. Adaptors were  
165 ligated to A-tailed library fragments using NEBNext quick ligase kit. Transposon-  
166 containing fragments were enriched by PCR using ComP7 primers ComP5 using Phusion

167 DNA polymerase (New England Biolabs) in a 20-cycle reaction. Library fragments were  
168 subsequently cleaned up with AMPureXP purification beads (Beckman).

## 169 **Data Analysis**

170 Indexed libraries were combined, spiked with 20% PhiX, and sequenced on the  
171 Illumina HiSeq 3000 platform, using v2 chemistry, generating single-end reads of 150 bp.  
172 Raw FASTQ sequence files were pre-processed using the TPP utility of TRANSIT python  
173 package (DeJesus *et al.*, 2015), including removing TRADIS tags and adapter sequences  
174 and mapping using BWA-MEM algorithm [32], to generate insertion files in .wig format.  
175 Custom annotations, 'prot tables', were created from the *M. bovis* strain AF2122/97  
176 annotation file (NCBI Accession Number LT708304, version LT708304.1) and for the  
177 *M. tuberculosis* strain, H37Rv (NCBI Accession Number AL123456, version AL123456.3,  
178 assembly build GCA\_000195955.2 (ENA)). TRANSIT was run on both *M.bovis* and  
179 *M. tuberculosis* files using the default normalisation (TTR) and the TRANSIT HMM  
180 algorithm (31) to make calls of essentiality for each TA insertion site, and for each gene  
181 based on annotated gene boundaries. Data files (fastq) are deposited in SRA  
182 (PRJNA754037)

## 183 **CRISPRi mediated gene silencing**

184 We utilised dCas9 from *Streptococcus pyogenes* (dCas9<sub>Spy</sub>) for silencing as  
185 previously described (32). sgRNA targeting *wag31*<sub>Mtb/Mb</sub> and *Rv2182c/Mb2204c* were  
186 designed according to the parameters derived from Larson *et al* 2013 (33). Protospacer  
187 adjacent motif (PAM) sites, "NGG," were chosen and putative sgRNAs 20 bp downstream  
188 of the PAM were selected. All sgRNAs designed targeted the coding non-template strand.  
189 The probability of complementarity to any other region of the genome and predicted  
190 secondary structure of the sgRNA transcript was analyzed using a basic local alignment  
191 search tool (BLAST) and M-fold, respectively (34,35). Complementary forward and  
192 reverse primers using the sequence (without the PAM) with appropriate ends for ligation  
193 to the pRH2521 vector were designed (Table 2). Oligos were annealed and cloned into  
194 pRH2521 using BbsI as previous (32,36). One microgram of pRH2502 was electroporated  
195 at 25 kV, 25  $\mu$ F with 1000  $\Omega$  resistance into electrocompetent *M. bovis* and *M. tuberculosis*  
196 to generate strains expressing dCas9<sub>Spy</sub> (*Mtb\_dCas9*/*Mb\_dCas9*). These strains were grown and

197 further electroporated with 1  $\mu$ g of pRH2521 expressing sgRNAs targeting *wag31*<sub>Mtb/Mb</sub>  
198 and *Rv2182c/Mb2204c* or pRH2521, the sgRNA -ve plasmid.

### 199 RNA Extraction and RT-qPCR

200 Cultures were grown to OD<sub>600</sub>  $\cong$  0.1–0.2 and the CRISPRi machinery induced with  
201 200 ng/ml of aTc for 1 h. Total RNA was extracted as previously described (37). Briefly,  
202 cultures were centrifuged at 3,488 x g at 4°C for 10 min. Pellets were resuspended in 1  
203 ml of TRIzol containing 0.1 mm glass beads and were disrupted by three cycles of 30 sec  
204 pulses at 6000 rpm using a Precellys homogenizer. RNA was purified using a Qiagen  
205 RNeasy kit combined with on-column DNase digestion according to the manufacturer's  
206 instructions. Quantity and quality were determined using a DeNovix Spectrophotometer  
207 (DeNovix Inc, USA) and agarose gel electrophoresis.

208 To remove traces of contaminating DNA, RNA samples were treated with RNase-  
209 free DNase I (Invitrogen) according to the manufacturer's instructions. cDNA was  
210 synthesized from 100 ng of RNA using Superscript III Reverse transcriptase according to  
211 manufacturer instructions. qPCRs were performed using PowerUp SYBR Green Master  
212 Mix with 1  $\mu$ l of cDNA and 0.3  $\mu$ M of either *sigA* primers or gene specific primers (Table  
213 2) in a final volume of 20  $\mu$ l. Samples were run on a BioRad CFX96 analyser at 50 °C for 2  
214 min, 95 °C for 2 min, followed by 40 cycles of 50 °C for 2 min, 95 °C for 2 min, followed by  
215 40 cycles of 95 °C for 15 sec, 72 °C for 1 min and 85 °C for 5 sec at which point fluorescence  
216 was captured. A melt curve analysis was also carried out for each run at 65 °C – 95 °C in  
217 increments of 0.5 °C. Gene expression data was analysed using the 2- $\Delta\Delta$ CT method (38).  
218 Reverse transcriptase -ve samples were used as a control to ensure removal of gDNA. All  
219 results were normalised against the house keeping gene *sigA*. Two or three biological  
220 replicates were run, with each measured in duplicate, unless otherwise stated.

221



## 222 **Results**

### 223 **High-density transposon libraries in *M. bovis* AF2122/97 and *M. tuberculosis*** 224 **H37Rv were generated**

225 The Mycomar transposon inserts randomly into TA sites in bacterial genomes.  
226 There are 73,536 and 74,604 TA sites present in the *M. bovis* (AF2122/97) and  
227 *M. tuberculosis* (H37Rv) genomes, respectively. The smaller number of TA sites in *M. bovis*  
228 is likely to be reflective of a smaller genome. We successfully generated transposon  
229 libraries in *M. bovis* and *M. tuberculosis* containing 39,987 (*M. bovis*) and 29,919 (*M.*  
230 *tuberculosis*) unique mutants, representing 54 % (*M. bovis*) and 40 % (*M. tuberculosis*)  
231 saturation. The distribution of transposon insertions in the two species is shown in figure  
232 1.

233 Himar1 transposase has been previously suggested to exhibit local sequence  
234 preferences rendering ~9% of possible TA sites non-permissive to insertion (23) and  
235 others have also observed TA insertion cold spots within the *M. tuberculosis* genome.  
236 Using the non-permissive sequence pattern, 'SGNTANCS' (where S is either G/C), we  
237 identified 6657 sites in both *M. bovis* and *M. tuberculosis* genomes (data not shown).  
238 Taking a similar approach to Carey *et al*, we found that removing these sites prior to  
239 determining gene essentiality as described below did not affect the gene calls (25).

240

### 241 **Comparisons of essentiality between *M. bovis* and *M. tuberculosis***

242 We examined *in vitro* gene essentiality in *M. bovis* and *M. tuberculosis* using the  
243 TRANSIT HMM method (31). This approach classifies genes into four categories; those  
244 that are essential for growth and cannot sustain a transposon insertion (ES), those where  
245 the transposon insertion results in a growth defect (GD) and those where the transposon  
246 insertion results in a growth advantage (GA). Those that show no impact as a result of the  
247 transposon insertion are considered non-essential (NE). From this analysis, 527 genes  
248 were classified as ES (15.3%), 176 genes were classified as GD (5.1%) and 131 as GA  
249 (3.8%) in the *M. bovis* genome. In *M. tuberculosis* 477 genes were classified as ES (13.7%),  
250 179 genes were classified as GD (5.1%) and 1 gene as GA (0.03%). A complete list of calls

251 for the genes that are conserved between both species is given in supplementary table  
252 S1. The status of the genes that are *M. bovis* specific are also included in the table.

253 Early sequencing and functional annotation of the genome of *M. tuberculosis*  
254 categorised genes into several different functional classes with an uneven distribution of  
255 genes across the classes (4,5). We examined the distribution of the genes classified as ES  
256 in *M. tuberculosis* (477) and *M. bovis* (527) across the functional classes to determine if  
257 (i) ES genes are over-represented in any particular functional class when compared to  
258 the genome as a whole (ii) there are differences between the two species. The results are  
259 shown in figure 2 and table 4. Chi squared testing showed that the distribution of ES genes  
260 across the functional classes was significantly different to the distribution of all orthologs  
261 ( $p < 0.01$ ). ES genes in both species are over-represented in “information pathways” and  
262 “intermediary metabolism and respiration” and under-represented in “conserved  
263 hypotheticals” and “PE/PPE” functional classes. Our data are in line with previous  
264 reports; Griffin *et al* noted that the distribution of ES genes across the different functional  
265 classes were different compared to the genome as a whole (22). DeJesus *et al* also noted  
266 that insertions in PE/PPE genes were under-represented likely due to GC rich sequences  
267 and an increased proportion of non-permissive TA sites in the PE/PPE genes (23). There  
268 were no major differences in distribution of ES genes across the functional classes when  
269 *M. tuberculosis* and *M. bovis* were compared with each other except for “insertion  
270 sequences and phages” which did not contain any genes classified as ES in the *M. bovis*  
271 genome.

272 Genes categorised as ES in this study were compared between the two species and  
273 also compared to previously reported studies (21–23,26,39) (supplementary file, table  
274 S1). We found that the *M. bovis* dataset generated in our study shared 370 (70%) of genes  
275 classified as ES with *M. tuberculosis in vitro* (this study; figure 3A) and up to 86% overlap  
276 with three key published *M. tuberculosis* data sets: DeJesus *et al* 2017 (71%), Griffin *et al*  
277 2011 (86%) and Minato *et al* 2019 (79%) indicating good correlation with previous  
278 reports (figure 3D). Similarly, the *M. tuberculosis* dataset generated in our study shared  
279 good overlap with other published datasets (figure 3C). When comparing *M. bovis* genes  
280 classified as ES with those reported by Butler *et al* 2020 (40) we found that 220 (42%)  
281 genes were shared between these data sets (figure 3B). Butler *et al* reported a total of  
282 318 genes to be essential in *M. bovis in vitro* prior to selection in *Dictyostelium discoideum*

283 compared to 527 reported in this study. Both libraries showed similar saturation levels  
284 (58% vs. 54% in this study) therefore differences might be due to the conditions under  
285 which the libraries were generated (although both studies used Middlebrook 7H11 solid  
286 medium supplemented with lysed sheep blood, heat inactivated foetal bovine serum and  
287 OADC) or between laboratory variation as might be expected for whole genome  
288 techniques such as Tnseq. It should also be noted that the similarities between the studies  
289 increases when GD genes are considered, for instance of the 307 genes that appear to be  
290 uniquely ES in our study, 212 of these are classified as GD in the study by Butler *et al.*,  
291 indicating a debilitating impact of the transposon insertion.

292

### 293 **Differences in gene essentiality between *M. bovis* and *M. tuberculosis***

294 Genes uniquely classified as ES in either species are of interest to determine  
295 potential genetic insights for phenotypic differences between these closely related  
296 mycobacterial species. In this study 157 genes were uniquely ES in *M. bovis* when  
297 compared to the *M. tuberculosis* (figure 3A), however, of these 157, 61 were classified as  
298 GD in *M. tuberculosis*. The remaining 96 were classified as NE in *M. tuberculosis*  
299 (supplementary file, table S2). The existence of multiple datasets allows for a robust  
300 meta-analysis and so we compared across datasets and found that there were 42 genes  
301 that were either ES or GD in this study and the study by Butler *et al.*, and were classified  
302 as NE in *M. tuberculosis* in this study and the study by DeJesus *et al.* (supplementary file,  
303 table S3). Included in this subset of genes is *Rv3543c* (*fadE19*), *Rv3541c* and *Rv3540c*  
304 (*lpt2*), genes which are encoded on the same operon (*Rv3545c-Rv3540c* - based on  
305 intergenic gaps) regulated by *kstR* and involved in cholesterol catabolism. This study and  
306 the Butler *et al.*, study indicates that insertional mutagenesis of this operon has a  
307 debilitating impact in *M. bovis* but not in *M. tuberculosis*.

308 Data for the entire *kstR* regulon is given in supplementary file, table S4.  
309 Interestingly, the media used in this study and the study by Butler *et al.*, contains traces  
310 of cholesterol due to the presence of lysed sheep blood, although there is no evidence that  
311 cholesterol presented a selective pressure (for *M. tuberculosis*) in this study as there is  
312 little overlap of the *M. tuberculosis* dataset with the study by Griffin *et al.*, In addition to  
313 the *Rv3545c-Rv3540c* operon considered above, several orthologs in the *kstR* regulon

314 were classified as ES in *M. bovis*; *Mb3538* (*Rv3508*), *Mb3568* (*Rv3538*) and *Mb3581*  
315 (*Rv3551*), and *Mb3595* (*Rv3565*). Others such as *Mb3541* (*Rv3511*) and *Mb3574c*  
316 (*Rv3544c*) were classified as GD. Interestingly insertions in the genes belonging to the  
317 *mce4* operon and required for growth on cholesterol mostly confer a GA for *M. bovis*.  
318 These observations might reflect a difference in the requirement for cholesterol  
319 catabolism *in vitro* in a complex carbon mixture compared to *M. tuberculosis*.

320 One of the key metabolic differences between *M. bovis* and *M. tuberculosis* is the  
321 inability of *M. bovis* to utilise carbohydrates. Genes in the glycolytic pathway  
322 (supplementary file, table S5) such as, enolase (*eno*), pyruvate kinase (*pykA*) and  
323 pyruvate carboxylase (*pca*) might be expected to be NE in *M. bovis* as *pykA* is non-  
324 functional in *M. bovis* (41). The datasets show that *eno* is ES in *M. bovis* as well as *M.*  
325 *tuberculosis* perhaps indicating that its essentiality is linked to a role other than  
326 glycolysis. Similarly, the suggestion that a transposon insertion in *pykA* confers a GA (this  
327 study only) is counter-intuitive and might suggest a non-glycolytic role for this enzyme.  
328 Only our dataset suggests that a transposon insertion in *icl1*, an enzyme required for  
329 growth on fatty acids, confers a growth advantage in *M. bovis*.

330 The two-component system PhoPR has been shown to regulate *de novo* PDIM  
331 synthesis and also co-ordinate the acid-stress response (16,42). It is of particular interest  
332 because a non-synonymous SNP in the sensor histidine kinase *phoR* in *M. bovis* renders  
333 signalling through the system defective, however, the existence of compensatory  
334 mechanisms that restore PDIM synthesis obscures the role of the regulon in *M. bovis*. Of  
335 the genes in the PhoPR regulon (supplementary file, table S6) only *Rv3778c* seems to be  
336 consistently required across species and studies. Genes in the redox sensing WhiB family  
337 are included in the operon (*whiB1*, *whiB3* and *whiB6*) but only *whiB1* is ES in *M. bovis* in  
338 our study.

339 Finally, as the electron transport chain and ATP synthesis is a relatively new  
340 therapeutic pathway we chose to examine ES more closely in these pathways  
341 (supplementary table, S7). These pathways are targets of recently introduced drugs such  
342 as bedaquiline (ATP synthase) and those in development e.g. Q203 which targets the  
343 terminal cytochrome bc<sub>1</sub>-aa<sub>3</sub> oxidase (43). Unsurprisingly, the genes encoding the ATP  
344 synthase are largely ES in both species in all studies (*Rv1304-Rv1311*) with the exception  
345 of *Rv1304* (*atpB*). The genes that encode a sub-unit of the terminal cytochrome bc<sub>1</sub>-aa<sub>3</sub>

346 oxidase complex (*qcrCAB*) the target of Q203 are classified as either ES or GD. One  
347 interesting observation is that both our study and the study by Butler *et al.*, is that a GD  
348 occurs as a result of an insertion in *nuoG* but this is not observed in any of the *M.*  
349 *tuberculosis* studies. *nuoG* forms part of the multi-subunit NADH reductase-I complex in  
350 the respiratory chain and transfers electrons to the menaquinone pool while  
351 simultaneously contributing to the proton gradient through its proton pumping function  
352

### 353 **Establishment of CRISPRi in *Mycobacterium bovis* using *wag31***

354 Wag31 is required for peptidoglycan synthesis and previously published datasets  
355 have classified *wag31* in *M. tuberculosis* as ES *in vitro* (21–23). This study classified *wag31*  
356 in *M. bovis* as ES but NE in *M. tuberculosis*. The study by Butler *et al.*, assigned *wag31* as  
357 NE in *M. bovis*. In order probe this discrepancy and to establish CRISPRi silencing in  
358 *M. bovis* this gene was chosen for silencing. Early CRISPRi studies in *M. tuberculosis*  
359 performed by Singh *et al.* successfully utilised two plasmids encoding sgRNAs guides  
360 targeting +26 bp to +45 bp and +144 bp to +163 bp downstream of the annotated start  
361 codon of *wag31*<sub>Mtb</sub> (table 1 and figure 4A). We utilised these plasmids to investigate the  
362 impact of silencing *wag31*<sub>Mb</sub>. *M. bovis* AF2122/97 was transformed with pRH2502 to  
363 create a strain expressing *dcas9*<sub>Spy</sub> (Mb\_dCas9). Mb\_dCas9 was then transformed with  
364 plasmids expressing the sgRNA guides. Strains were cultured to exponential phase and  
365 serial dilutions were spotted onto agar containing 200 ng/ml aTc. Controls (without aTc,  
366 without sgRNA) were also included. The results, presented in figure 4B, show that  
367 silencing *wag31*<sub>Mb</sub> in *M. bovis* results in a severe growth defect, visible at 10<sup>-1</sup> dilution with  
368 complete cessation of growth at 10<sup>-2</sup> dilution. This growth defect is identical to that seen  
369 in *M. tuberculosis* and supports the ES classification.

370

### 371 **Silencing *Rv2182c* and its ortholog *Mb2204c* shows a species-specific growth** 372 **impact**

373 *Rv2182c/Mb2204c* is annotated as a 1-acylglycerol-3-phosphate O-  
374 acyltransferase (*agpat*) and involved in glycerophospholipid metabolism. It is thought to  
375 synthesize diacylglycerol-3P through the addition of acyl chains to monoacylglycerol-3P.  
376 It is classified as ES in *M. tuberculosis* in this study and by others (22,23,44). It is classified

377 as ES in *M. bovis* in this study but NE in the study by Butler *et al.*,. Strains of *M. tuberculosis*  
378 and *M. bovis* were constructed expressing sgRNAs targeting +2 bp to +21 bp and +40 bp  
379 to +59 bp downstream of the annotated start codon of *Rv2182c/Mb2204c* (table 2 and  
380 figure 5A). The impact of inducing the system on expression of *Rv2182c/Mb2204c* was  
381 measured using RT-qPCR. The results, which are shown in figure 5B show that dCas9<sub>Spy</sub>  
382 is similarly induced in both *M. tuberculosis* and *M. bovis* with 150 to 350-fold induction of  
383 expression in the presence of aTc. Additionally, the results show that, in the presence of  
384 the sgRNA, there is a clear reduction in expression of *Rv2182c/Mb2204c* in both species.  
385 These data demonstrate effective gene silencing of *Rv2182c/Mb2204c* in both  
386 *M. tuberculosis* and *M. bovis*, respectively.

387 To determine the impact of induction of the guides, strains were cultured to  
388 exponential phase and serial dilutions were spotted onto agar containing 200 ng/ml aTc.  
389 The results (figure 5C) show that silencing *Rv2182c* in *M. tuberculosis* results in a severe  
390 growth defect, with almost complete cessation of growth at 10<sup>-1</sup> dilution. However, the  
391 consequence of silencing *Mb2204c* on the growth of *M. bovis* is far less impactful with a  
392 small reduction visible at the lowest dilution 10<sup>-4</sup>. This demonstrates that, unlike *wag31*,  
393 silencing of *Rv2182c* and its ortholog *Mb2204c* in *M. tuberculosis* and *M. bovis* respectively,  
394 has a differential impact on growth, with *M. tuberculosis* being more vulnerable and  
395 showing a greater growth defect. These results do not support the classification of  
396 *Mb2204c* as an ES gene in *M. bovis* but they clearly highlight that there are different  
397 phenotypic consequences as a result of silencing the ortholog in both species.

398

## 399 Discussion

400 The aim of this work was to directly compare gene essentiality in the human and  
401 animal adapted members of the MTBC. In order to do this we generated transposon  
402 libraries in *M. bovis* AF2122/97 and *M. tuberculosis* H37Rv using a rich medium that  
403 supported the growth of both species. We assessed gene essentiality using the TRANSIT  
404 HMM method to define 527 and 477 genes as ES for *M. bovis* and *M. tuberculosis*,  
405 respectively. Datasets from each species were compared with each other and with  
406 previously published datasets. Genes classified as ES were congruent between the species  
407 and also with existing studies of gene essentiality in *M. tuberculosis* (21–23,39).

408 Comparing this study with a previously published *M. bovis* dataset revealed a 42%  
409 overlap which increased when genes predicted to show a GD as a result of the transposon  
410 insertion were taken into account (26). There were some indications of differences  
411 between the species, and a meta-analysis of the data indicated that 42 genes were  
412 differentially essential between the species. A recent study using whole genome CRISPRi  
413 screens showed that a similar number (80 genes) were differentially essential in two  
414 different strains of *M. tuberculosis* (H37Rv vs HN878) (45). Genes that appear to show  
415 differential essentiality between the two species include those involved in cholesterol  
416 catabolism.

417 Whole-genome TnSeq provides a high-throughput assessment of fitness costs and  
418 has allowed the classification of genes based on essentiality but does not provide  
419 information on target vulnerability. More recent studies highlight the limitations of the  
420 (near) binary classification of genes into and ES/NE and utilise CRISPRi to assess  
421 vulnerability (45,46). Additionally, datasets are prone to false calls of ES due to non-  
422 saturating mutagenesis. In this study CRISPRi was utilised to show that there are different  
423 impacts on bacterial growth as a result of silencing *Rv2182c/Mb2204c* in their respective  
424 species, despite achieving similar levels of gene silencing. Significant growth inhibition  
425 was seen as a result of silencing in *Rv2182c* in *M. tuberculosis* while only marginal impacts  
426 on growth were observed on silencing the ortholog *Mb2204c* in *M. bovis*.  
427 *Rv2182c/Mb2204c* is annotated as a 1-acylglycerol-3-phosphate O-acyltransferase and  
428 involved in glycerophospholipid metabolism. It is thought to synthesize diacylglycerol-  
429 3P through the addition of acyl chains to monoacylglycerol-3P. This pathway may be  
430 involved in detoxification and further work is required to fully understand the differential  
431 impact of silencing this gene in the two species. Given that *Rv2182c* was a predicted target  
432 in a recent compound screen (47), differential essentiality estimates in *M. bovis* and  
433 *M. tuberculosis* are important to predict if zoonotic TB caused by *M. bovis* can also be  
434 suitably treated with drugs designed to be effective against *M. tuberculosis*.

435 We have provided a comparative analysis of the genetic requirements for growth  
436 of two key MTBC members: *M. bovis* and *M. tuberculosis*. Genes which are uniquely ES for  
437 either *M. bovis* or *M. tuberculosis* have the potential to provide insights into niche specific  
438 aspects e.g., host tropism, survival in the environment, phenotype, and anti-tubercular  
439 drugs. Host tropism is of particular interest when considering the zoonotic nature of *M.*

440 *bovis* and the involvement of wildlife hosts as reservoirs of infection for bovine TB. Use  
441 of *M. bovis* libraries in the context of the host i.e., through experimental infection of bovine  
442 TB will enable the study of the genetic requirements for survival *in vivo*. Further  
443 investigations exploring the role and function of ES genes between *M. bovis* and  
444 *M. tuberculosis* is necessary to better understand the physiological differences in these  
445 key MTBC species.

446

447

448

449

450

451



## References

- 453 1. Malone KM, Gordon S V. "Mycobacterium tuberculosis complex members adapted  
454 to wild and domestic animals," in *Advances in Experimental Medicine and Biology*  
455 (Springer New York LLC), 135–154. doi:10.1007/978-3-319-64371-7\_7
- 456 2. WHO. WHO | Global tuberculosis report 2019. *World Heal Organ* (2020)  
457 doi:10.1037//0033-2909.126.1.78
- 458 3. Fao. Roadmap for zoonotic tuberculosis. *WHO* (2017) Available at: [www.who.int](http://www.who.int)  
459 [Accessed May 11, 2020]
- 460 4. Camus JC, Pryor MJ, Médigue C, Cole ST. Re-annotation of the genome sequence of  
461 Mycobacterium tuberculosis H37Rv. *Microbiology* (2002) **148**:2967–2973.  
462 doi:10.1099/00221287-148-10-2967
- 463 5. Cole ST, Brosch R, Parkhill J, Garnier T, Churcher C, Harris D, Gordon S V.,  
464 Eiglmeier K, Gas S, Barry CE, et al. Deciphering the biology of mycobacterium  
465 tuberculosis from the complete genome sequence. *Nature* (1998) **393**:537–544.  
466 doi:10.1038/31159
- 467 6. Malone KM, Farrell D, Stuber TP, Schubert OT, Aegersold R, Robbe-Austerman S,  
468 Gordon S V. Updated reference genome sequence and annotation of  
469 mycobacterium bovis AF2122/97. *Genome Announc* (2017) **5**:  
470 doi:10.1128/genomeA.00157-17
- 471 7. Garnier T, Eiglmeier K, Camus JC, Medina N, Mansoor H, Pryor M, Duthoy S,  
472 Grondin S, Lacroix C, Monsempe C, et al. The complete genome sequence of  
473 Mycobacterium bovis. *Proc Natl Acad Sci U S A* (2003) **100**:7877–7882.  
474 doi:10.1073/pnas.1130426100
- 475 8. Brites D, Loiseau C, Menardo F, Borrell S, Boniotti MB, Warren R, Dippenaar A,  
476 Parsons SDC, Beisel C, Behr MA, et al. A new phylogenetic framework for the  
477 animal-adapted mycobacterium tuberculosis complex. *Front Microbiol* (2018)  
478 **9**:2820. doi:10.3389/fmicb.2018.02820
- 479 9. Golby P, Hatch KA, Bacon J, Cooney R, Riley P, Allnut J, Hinds J, Nunez J, Marsh PD,  
480 Hewinson RG, et al. Comparative transcriptomics reveals key gene expression  
481 differences between the human and bovine pathogens of the Mycobacterium  
482 tuberculosis complex. *Microbiology* (2007) **153**:3323–3336.  
483 doi:10.1099/mic.0.2007/009894-0
- 484 10. Rehren G, Walters S, Fontan P, Smith I, Zárraga AM. Differential gene expression  
485 between Mycobacterium bovis and Mycobacterium tuberculosis. *Tuberculosis*  
486 (2007) **87**:347–359. doi:10.1016/j.tube.2007.02.004
- 487 11. Malone KM, Rue-Albrecht K, Magee DA, Conlon K, Schubert OT, Nalpas NC,  
488 Browne JA, Smyth A, Gormley E, Aegersold R, et al. Comparative 'omics analyses  
489 differentiate mycobacterium tuberculosis and mycobacterium bovis and reveal  
490 distinct macrophage responses to infection with the human and bovine tubercle  
491 bacilli. *Microb Genomics* (2018) **4**: doi:10.1099/mgen.0.000163
- 492 12. Saïd-Salim B, Mostowy S, Kristof AS, Behr MA. Mutations in Mycobacterium  
493 tuberculosis Rv0444c, the gene encoding anti-SigK, explain high level expression  
494 of MPB70 and MPB83 in Mycobacterium bovis. *Mol Microbiol* (2006) **62**:1251–  
495 1263. doi:10.1111/j.1365-2958.2006.05455.x
- 496 13. Wiker HG. MPB70 and MPB83 - Major antigens of mycobacterium bovis. *Scand J*  
497 *Immunol* (2009) **69**:492–499. doi:10.1111/j.1365-3083.2009.02256.x
- 498 14. Queval CJ, Fearn A, Botella L, Smyth A, Schnettger L, Mitermite M, Wooff E,  
499 Villarreal-Ramos B, Garcia-Jimenez W, Heunis T, et al. Macrophage-specific

- 500 responses to human and animal-adapted tubercle bacilli reveal pathogen and host  
501 factors driving multinucleated cell formation. *PLoS Pathog* (2021) **17**:e1009410.  
502 doi:10.1371/journal.ppat.1009410
- 503 15. Bigi MM, Blanco FC, Araújo FR, Thacker TC, Zumárraga MJ, Cataldi AA, Soria MA,  
504 Bigi F. Polymorphisms of 20 regulatory proteins between *Mycobacterium*  
505 *tuberculosis* and *Mycobacterium bovis*. *Microbiol Immunol* (2016) **60**:552–560.  
506 doi:10.1111/1348-0421.12402
- 507 16. García EA, Blanco FC, Klepp LI, Pazos A, McNeil MR, Jackson M, Bigi F. Role of  
508 PhoPR in the response to stress of *Mycobacterium bovis*. *Comp Immunol Microbiol*  
509 *Infect Dis* (2021) **74**:101593. doi:10.1016/j.cimid.2020.101593
- 510 17. Broset E, Martín C, Gonzalo-Asensio J. Evolutionary landscape of the  
511 *mycobacterium tuberculosis* complex from the viewpoint of phoPR: Implications  
512 for virulence regulation and application to vaccine development. *MBio* (2015) **6**:  
513 doi:10.1128/mBio.01289-15
- 514 18. Sohaskey CD, Modesti L. Differences in nitrate reduction between *mycobacterium*  
515 *tuberculosis* and *mycobacterium bovis* are due to differential expression of both  
516 narGHJI and narK2. *FEMS Microbiol Lett* (2009) **290**:129–134.  
517 doi:10.1111/j.1574-6968.2008.01424.x
- 518 19. Sasseti CM, Boyd DH, Rubin EJ. Comprehensive identification of conditionally  
519 essential genes in mycobacteria. *Proc Natl Acad Sci U S A* (2001) **98**:12712–  
520 12717. doi:10.1073/pnas.231275498
- 521 20. Rengarajan J, Bloom BR, Rubin EJ. Genome-wide requirements for *Mycobacterium*  
522 *tuberculosis* adaptation and survival in macrophages. *Proc Natl Acad Sci U S A*  
523 (2005) **102**:8327–8332. doi:10.1073/pnas.0503272102
- 524 21. Minato Y, Gohl DM, Thiede JM, Chacón JM, Harcombe WR, Maruyama F, Baughn  
525 AD. Genomewide Assessment of *Mycobacterium tuberculosis* Conditionally  
526 Essential Metabolic Pathways. *mSystems* (2019) **4**:  
527 doi:10.1128/MSYSTEMS.00070-19
- 528 22. Griffin JE, Gawronski JD, Dejesus MA, Ioerger TR, Akerley BJ, Sasseti CM. High-  
529 resolution phenotypic profiling defines genes essential for mycobacterial growth  
530 and cholesterol catabolism. *PLoS Pathog* (2011) **7**:e1002251.  
531 doi:10.1371/journal.ppat.1002251
- 532 23. Dejesus MA, Gerrick ER, Xu W, Park SW, Long JE, Boutte CC, Rubin EJ,  
533 Schnappinger D, Ehrt S, Fortune SM, et al. Comprehensive essentiality analysis of  
534 the *Mycobacterium tuberculosis* genome via saturating transposon mutagenesis.  
535 *MBio* (2017) **8**: doi:10.1128/mBio.02133-16
- 536 24. Zhang YJ, Ioerger TR, Huttenhower C, Long JE, Sasseti CM, Sacchettini JC, Rubin  
537 EJ. Global assessment of genomic regions required for growth in *Mycobacterium*  
538 *tuberculosis*. *PLoS Pathog* (2012) **8**:e1002946.  
539 doi:10.1371/journal.ppat.1002946
- 540 25. Carey AF, Rock JM, Krieger I V., Chase MR, Fernandez-Suarez M, Gagneux S,  
541 Sacchettini JC, Ioerger TR, Fortune SM. TnSeq of *Mycobacterium tuberculosis*  
542 clinical isolates reveals strain-specific antibiotic liabilities. *PLoS Pathog* (2018)  
543 **14**:e1006939. doi:10.1371/journal.ppat.1006939
- 544 26. Butler RE, Smith AA, Mendum TA, Chandran A, Wu H, Lefrançois L, Chambers M,  
545 Soldati T, Stewart GR. *Mycobacterium bovis* uses the ESX-1 Type VII secretion  
546 system to escape predation by the soil-dwelling amoeba *Dictyostelium*  
547 *discoideum*. (2020) **14**:919–930. doi:10.1038/s41396-019-0572-z
- 548 27. Gallagher J, Horwill DM. A selective oleic acid albumin agar medium for the

- 549 cultivation of *Mycobacterium bovis*. *J Hyg (Lond)* (1977) **79**:155–60.  
550 doi:10.1017/s0022172400052943
- 551 28. Majumdar G, Mbau R, Singh V, Warner DF, Dragset MS, Mukherjee R. “Genome-  
552 Wide Transposon Mutagenesis in *Mycobacterium tuberculosis* and  
553 *Mycobacterium smegmatis*,” in *Methods in molecular biology (Clifton, N.J.)*, 321–  
554 335. doi:10.1007/978-1-4939-6472-7\_21
- 555 29. Long JE, DeJesus M, Ward D, Baker RE, Ioerger T, Sasseti CM. “Identifying  
556 Essential Genes in *Mycobacterium tuberculosis* by Global Phenotypic Profiling,” in  
557 (Humana Press, New York, NY), 79–95. doi:10.1007/978-1-4939-2398-4\_6
- 558 30. Belisle JT, Sonnenberg MG. Isolation of genomic DNA from mycobacteria. *Methods*  
559 *Mol Biol* (1998) **101**:31–44. doi:10.1385/0-89603-471-2:31
- 560 31. DeJesus MA, Ioerger TR. A Hidden Markov Model for identifying essential and  
561 growth-defect regions in bacterial genomes from transposon insertion  
562 sequencing data. *BMC Bioinformatics* (2013) **14**: doi:10.1186/1471-2105-14-303
- 563 32. Singh AK, Carette X, Potluri LP, Sharp JD, Xu R, Pristic S, Husson RN. Investigating  
564 essential gene function in *Mycobacterium tuberculosis* using an efficient CRISPR  
565 interference system. *Nucleic Acids Res* (2016) **44**:e143–e143.  
566 doi:10.1093/nar/gkw625
- 567 33. Larson MH, Gilbert LA, Wang X, Lim WA, Weissman JS, Qi LS. CRISPR interference  
568 (CRISPRi) for sequence-specific control of gene expression. *Nat Protoc* (2013)  
569 **8**:2180–2196. doi:10.1038/nprot.2013.132
- 570 34. M Z. Mfold web server for nucleic acid folding and hybridization prediction.  
571 *Nucleic Acids Res* (2003) **31**:3406–3415. doi:10.1093/NAR/GKG595
- 572 35. Altschul SF, Gish W, Miller W, Myers EW, Lipman DJ. Basic local alignment search  
573 tool. *J Mol Biol* (1990) **215**:403–410. doi:10.1016/S0022-2836(05)80360-2
- 574 36. Choudhary E, Thakur P, Pareek M, Agarwal N. Gene silencing by CRISPR  
575 interference in mycobacteria. *Nat Commun* (2015) **6**: doi:10.1038/ncomms7267
- 576 37. Rustad TR, Roberts DM, Liao RP, Sherman DR. Isolation of mycobacterial RNA.  
577 *Methods Mol Biol* (2008) **465**:13–22. doi:10.1007/978-1-59745-207-6\_2
- 578 38. Livak KJ, Schmittgen TD. Analysis of relative gene expression data using real-time  
579 quantitative PCR and the 2- $\Delta\Delta$ CT method. *Methods* (2001) **25**:402–408.  
580 doi:10.1006/meth.2001.1262
- 581 39. Serafini A, Tan L, Horswell S, Howell S, Greenwood DJ, Hunt DM, Phan M,  
582 Schembri M, Monteleone M, Montague CR, et al. *Mycobacterium tuberculosis*  
583 requires glyoxylate shunt and reverse methylcitrate cycle for lactate and pyruvate  
584 metabolism. *Mol Microbiol* (2019) **112**:1284–1307. doi:10.1111/mmi.14362
- 585 40. Butler RE, Smith AA, Mendum TA, Chandran A, Wu H, Lefrançois L, Chambers M,  
586 Soldati T, Stewart GR. *Mycobacterium bovis* uses the ESX-1 Type VII secretion  
587 system to escape predation by the soil-dwelling amoeba *Dictyostelium*  
588 *discoideum*. *ISME J 2020 144* (2020) **14**:919–930. doi:10.1038/s41396-019-  
589 0572-z
- 590 41. Keating LA, Wheeler PR, Mansoor H, Inwald JK, Dale J, Hewinson RG, Gordon S V.  
591 The pyruvate requirement of some members of the *Mycobacterium tuberculosis*  
592 complex is due to an inactive pyruvate kinase: implications for in vivo growth.  
593 *Mol Microbiol* (2005) **56**:163–174. doi:10.1111/J.1365-2958.2005.04524.X
- 594 42. Gonzalo-Asensio J, Malaga W, Pawlik A, Astarie-Dequeker C, Passemar C, Moreau  
595 F, Laval F, Daffé M, Martin C, Brosch R, et al. Evolutionary history of tuberculosis  
596 shaped by conserved mutations in the PhoPR virulence regulator. *Proc Natl Acad*  
597 *Sci U S A* (2014) **111**:11491–11496. doi:10.1073/pnas.1406693111

- 598 43. Pethe K, Bifani P, Jang J, Kang S, Park S, Ahn S, Jiricek J, Jung J, Jeon HK, Cechetto J,  
599 et al. Discovery of Q203, a potent clinical candidate for the treatment of  
600 tuberculosis. *Nat Med* (2013) **19**:1157–1160. doi:10.1038/nm.3262
- 601 44. Minato Y, Gohl DM, Thiede JM, Chacón JM, Harcombe WR, Maruyama F, Baughn  
602 AD. Genome-wide assessment of Mycobacterium tuberculosis conditionally  
603 essential metabolic pathways. *bioRxiv* (2019)534289. doi:10.1101/534289
- 604 45. Bosch B, DeJesus MA, Poulton NC, Zhang W, Engelhart CA, Zaveri A, Lavalette S,  
605 Ruecker N, Trujillo C, Wallach JB, et al. Genome-wide gene expression tuning  
606 reveals diverse vulnerabilities of M. tuberculosis. *Cell* (2021)  
607 doi:10.1016/j.cell.2021.06.033
- 608 46. McNeil MB, Keighley LM, Cook JR, Cheung C, Cook GM. CRISPR interference  
609 identifies vulnerable cellular pathways with bactericidal phenotypes in  
610 Mycobacterium tuberculosis. *Mol Microbiol* (2021)mmi.14790.  
611 doi:10.1111/mmi.14790
- 612 47. Martínez-Jiménez F, Papadatos G, Yang L, Wallace IM, Kumar V, Pieper U, Sali A,  
613 Brown JR, Overington JP, Marti-Renom MA. Target Prediction for an Open Access  
614 Set of Compounds Active against Mycobacterium tuberculosis. *PLoS Comput Biol*  
615 (2013) **9**:1003253. doi:10.1371/journal.pcbi.1003253
- 616 48. Gu Z, Gu L, Eils R, Schlesner M, Brors B. circlize implements and enhances circular  
617 visualization in R. *Bioinformatics* (2014) **30**:2811–2812.  
618 doi:10.1093/BIOINFORMATICS/BTU393

619

620 **Author Contributions**

621 AJG, SW, IP and SLK designed the study. AJG, IP, VF, carried out the experimental work.  
622 Data analysis was done by IN, JS and DX. SLK, DW, BWW and BVR did funding acquisition.  
623 AJG and SLK wrote the first draft of the manuscript. All authors contributed to the  
624 manuscript revision, read, and approved the submitted version.

625

626 **Funding**

627 This work was funded by the BBSRC Grant Ref: BB/N004590/1 (awarded to SLK (PI), DW  
628 (Co-I), BWW (Co-I) and SE3314 to BVR as part of the joint BBSRC-DEFRA EradTB  
629 consortium. AJG, IP and SW were supported by the funding. VF was in receipt of an RVC  
630 PhD studentship. AJG currently holds a Sêr Cymru II Lectureship funded by the European  
631 Research Development Fund and Welsh Government. BVR is a Ser Cymru II Professor of  
632 Immunology at Aberystwyth University.

633

634 **Table 1. Strains and plasmids used in this study**

| Strain/plasmid                      | Genotype/Description                                                                                                                                                                        | Source     |
|-------------------------------------|---------------------------------------------------------------------------------------------------------------------------------------------------------------------------------------------|------------|
| <b><i>Strains</i></b>               |                                                                                                                                                                                             |            |
| <i>E. coli</i> DH5α                 | <i>SupE44 ΔlacU169 (lacZΔM15) hsdR17 recA1 endA1 gyrA96 thi-1 relA1</i>                                                                                                                     | Invitrogen |
| <i>M. bovis</i> AF2122/97           | <i>M. bovis</i> reference strain                                                                                                                                                            |            |
| <i>M. tuberculosis</i> H37Rv        | <i>M. tuberculosis</i> reference strain                                                                                                                                                     |            |
| Mtb_dCas9/ Mb_dCas9                 | <i>M. tuberculosis</i> or <i>M. bovis</i> with integrative plasmid containing <i>dCas9<sub>Spy</sub></i> (pRH2502), kan <sup>R</sup>                                                        | This study |
| Mtb_dCas9_control/ Mb_dCas9_control | Mtb_dCas9/Mb_dCas9 with sgRNA -ve control plasmid (pRH2521), kan <sup>R</sup> , hyg <sup>R</sup>                                                                                            | This study |
| Mtb_dCas9_wag1/ Mb_dCas9_wag1       | Mtb_dCas9/Mb_dCas9 expressing sgRNA targeting +26 bp to +45 bp downstream of the <i>wag31<sub>Mtb</sub>/wag31<sub>Mb</sub></i> annotated start codon. kan <sup>R</sup> hyg <sup>R</sup>     | This study |
| Mtb_dCas9_wag2/ Mb_dCas9_wag2       | Mtb_dCas9/Mb_dCas9 expressing sgRNA targeting +144 bp to +163 bp downstream of the <i>wag31<sub>Mtb</sub>/wag31<sub>Mb</sub></i> annotated start codon. kan <sup>R</sup> , hyg <sup>R</sup> | This study |
| Mtb_dCas9_agpat1/ Mb_dCas9_agpat1   | Mtb_dCas9/Mb_dCas9 expressing sgRNA targeting +2 bp to +21 bp downstream of the <i>Rv2182c/Mb2204c</i> annotated start codon. kan <sup>R</sup> hyg <sup>R</sup>                             | This study |
| Mtb_dCas9_agpat2/ Mb_dCas9_agpat2   | Mtb_dCas9/Mb_dCas9 expressing sgRNA targeting +40 bp to +59 bp downstream of the <i>Rv2182c/Mb2204c</i> annotated start codon. kan <sup>R</sup> hyg <sup>R</sup>                            | This study |
| <b><i>Plasmids</i></b>              |                                                                                                                                                                                             |            |
| pRH2502                             | Integrative plasmid derived from pTC-0X-1L, expressing <i>dCas9<sub>Spy</sub></i> from an inducible tetRO promoter (uv15tetO). kan <sup>R</sup>                                             | (32)       |
| pRH2521                             | Non-integrative plasmid derived from pTE-10M-0X, expressing sgRNA from an inducible tetRO promoter (Pmyc1tetO). hyg <sup>R</sup>                                                            | (32)       |
| pRH2521_wag1                        | pRH2521 with an sgRNA targeting +26 bp to +45 bp downstream of the <i>wag31<sub>Mtb</sub>/wag31<sub>Mb</sub></i> annotated start codon. hyg <sup>R</sup>                                    | (32)       |
| pRH2521_wag2                        | pRH2521 with an sgRNA targeting +144 bp to +163 bp downstream of the <i>wag31<sub>Mtb</sub>/wag31<sub>Mb</sub></i> annotated start codon. hyg <sup>R</sup>                                  | (32)       |
| pRH2521_agpat1                      | pRH2521 with an sgRNA targeting +2 bp to +21 bp over and downstream of the <i>Rv2182c/Mb2204c</i> annotated start codon. hyg <sup>R</sup>                                                   | This study |
| pRH2521_agpat2                      | pRH2521 with an sgRNA targeting +40 bp to +59 bp downstream of the <i>Rv2182c/Mb2204c</i> annotated start codon. hyg <sup>R</sup>                                                           | This study |

635

636

637 **Table 2. Oligonucleotides used in this study.**

| Primer                                                                      | Sequence                                                                      |
|-----------------------------------------------------------------------------|-------------------------------------------------------------------------------|
| <b><i>Primers used for Tn library</i></b>                                   |                                                                               |
| Adaptor standard                                                            | GATCGGAAGAGCACAC                                                              |
| Adaptor P7+index <sup>a</sup>                                               | CAAGCAGAAGACGGCATACGAGATXXXXXXXXGTGACTGGAGTTCAGACGTGTGCTCTTCCGATCT            |
| ComP7 primer                                                                | CAAGCAGAAGACGGCATACG                                                          |
| ComP5 primer                                                                | AATGATACGGCGACCACCGAGATCTACACTCTTCCCTACACGACGCTTCCGATCTCGGGGACTTATCAGCCAACCTG |
| <b><i>Oligonucleotides used for nested PCR verification</i></b>             |                                                                               |
| HiMar_Right_1                                                               | CCTCGTGCTTTACGGTATCG                                                          |
| Arb_primer_1c*                                                              | GCCAGCGAGCTAACGAGACNNNNN                                                      |
| HiMar_Tn_Jnct_PCR                                                           | ACTATAGGGGTCTAGAGACCGGG                                                       |
| Arb_primer_1*                                                               | GCCAGCGAGCTAACGAGAC                                                           |
| <b><i>Oligonucleotides used for CRISPRi silencing sgRNA<sup>b</sup></i></b> |                                                                               |
| agpat1_F                                                                    | <u>AAAC</u> TGTGGTACTACCTGTTCAAG                                              |
| agpat1_R                                                                    | <u>GGGAC</u> TTGAACAGGTAGTACCACA                                              |
| agpat2_F                                                                    | <u>AAAC</u> TCTTTACGTTGCTTGGTCG                                               |
| agpat2_R                                                                    | <u>GGGAC</u> GCACCAAGCAACGTAAAGAG                                             |
| <b><i>Oligonucleotides used for RT-qPCR</i></b>                             |                                                                               |
| sigA_Fq                                                                     | CCTACGCTACGTGGTGGATT                                                          |
| sigA_Rq                                                                     | TGGATTTCCAGCACCTTCTC                                                          |
| agpat1_Fq                                                                   | CTTTACGTTGCTTGGTCGCC                                                          |
| agpat1_Rq                                                                   | AGAACCAGCGGTTGATCCAG                                                          |
| dCas9 <sub>Spy</sub> _Fq                                                    | AAGAAGTACAGCATCGGCCTGG                                                        |
| dCas9 <sub>Spy</sub> _Rq                                                    | TTCTTGCGCCGCGTGATCG                                                           |

638 <sup>a</sup> XXXXXXXX in AdaptorP7+index primer denotes sequence of variable indices used.639 <sup>b</sup> The four bases underlined at the start of each oligo were used for cloning into pRH2521.

640 **Table 3. Summary statistics of the Tn libraries created in this study**

641

---

|                 | <i>M. bovis</i><br><i>AF2122/97</i> | <i>M. tuberculosis</i><br><i>H37Rv</i> |
|-----------------|-------------------------------------|----------------------------------------|
| Unique Mutants  | 39,987 (of 73,536)                  | 29,919 (of 74,604)                     |
| Saturation      | 54%                                 | 40%                                    |
| Essential Genes | 528                                 | 477                                    |

---

642



643 **Table 4. Distribution of genes classified as ES across functional class**

644

| <b>Functional class</b>                  | <b>% ES Mb</b> | <b>%ES Mtb</b> | <b>% all</b> |
|------------------------------------------|----------------|----------------|--------------|
| cell wall and cell processes             | 19.7           | 18.66          | 18.71        |
| conserved hypotheticals                  | 10.23          | 10.90          | 28.11        |
| information pathways                     | 17.61          | 18.87          | 5.96         |
| insertion seqs and phages                | 0              | 0.63           | 2.54         |
| intermediary metabolism and respiration  | 42.23          | 38.57          | 23.1         |
| lipid metabolism                         | 4.73           | 5.03           | 6.5          |
| PE/PPE                                   | 0.95           | 1.68           | 4.44         |
| regulatory proteins                      | 2.27           | 3.35           | 4.93         |
| virulence, detoxification and adaptation | 2.27           | 2.31           | 5.71         |

645

646

## 647 **Figure Legends**

### 648 **Figure 1: Distribution of Tn insertions in both *M. tuberculosis* and *M. bovis*.**

649 Transposon libraries were created in *M. tuberculosis* and *M. bovis* using the *Himar1*  
650 system and sequenced on a HiSeq NGS platform (Illumina, UK) as described in the  
651 materials and methods. Insertion locations of *Himar1* across the *M. tuberculosis* genome  
652 (green) and *M. bovis* genome (blue) were visualised using Circlize (48).

### 653 **Figure 2: Functional category distribution.**

654 Gene essentiality was determined for *M.*  
655 *bovis* and *M. tuberculosis* using custom HMM analyses with TRANSIT software. Functional  
656 categories were assigned to orthologous genes and compared for *Himar1* insertion  
657 distribution between *M. bovis* (left) and *M. tuberculosis* (right). Transposon insertions  
658 were found to be similar across functional categories. Data were analysed using pivot  
659 tables in Excel.

### 659 **Figure 3: Essential Gene Comparisons.**

660 Gene essentiality was determined for *M. bovis*  
661 and *M. tuberculosis* using custom HMM analyses with TRANSIT software and compared  
662 to previously published datasets. **(A)** *M. bovis* and *M. tb* (both this study), **(B)** *M. bovis*  
663 (this study) and *M. bovis* (Butler *et al* 2020) **(C)** *M. tb* (this study) and *M. tb* DJ (DeJesus *et*  
664 *al* 2017), *M. tb* G (Griffin *et al* 2011) and *M. tb* M (Minato *et al* 2019) and **(D)** *M. bovis* (this  
665 study) and *M. tb* DJ (DeJesus *et al* 2017), *M. tb* G (Griffin *et al* 2011) and *M. tb* M (Minato  
666 *et al* 2019).

### 666 **Figure 4. Using CRISPRi/dCas9 to inhibit *wag31* expression in *M. bovis* and**

#### 667 ***M. tuberculosis* (A)** Schematic showing the target regions of two sgRNAs designed to

668 target and inhibit *wag31* expression. The numbers show the nucleotide position of the

669 sgRNA relative to the annotated start site **(B)** CRISPRi strains were cultured in 10 ml of

670 supplemented 7H9 medium to exponential phase and diluted to  $2 \times 10^7$  CFU/ml. A 10-

671 fold serial dilution to  $10^{-4}$  was performed and 20  $\mu$ l of each dilution was spotted onto

672 7H11 agar without aTc and with 200 ng / ml aTc to induce CRISPRi/ dCas9 and the sgRNA

673 in those strains that carried the guide. Two biological replicates were carried out.

### 674 **Figure 5. Using CRISPRi/dCas9 to inhibit *Rv2182c/Mb2204c* expression in *M. bovis***

675 **and *M. tuberculosis*. (A)** Schematic showing the target regions of two sgRNAs designed

676 to target and inhibit *Rv2182c/Mb2204c* expression. The numbers show the nucleotide

677 position of the sgRNA relative to the annotated start site **(B)** *dCas9* expression and

678 *Rv2182c/Mb2204c* expression were measured by RT-qPCR as described in the methods  
679 section. Gene expression was analysed using the  $2^{-\Delta\Delta CT}$  method, normalised against *sigA*.  
680 Results represent two biological repeats with two technical repeats each.  $P = * <0.05$ , \*\*  
681  $<0.01$ , \*\*\*  $<0.001$ , \*\*\*\*  $<0.0001$  or not significant (ns), analysed using a 2-way ANOVA  
682 test **(C)** CRISPRi strains were cultured in 10 ml of supplemented 7H9 medium to  
683 exponential phase and diluted to  $2 \times 10^7$  CFU/ ml. A 10-fold serial dilution to  $10^{-4}$  was  
684 performed and 20  $\mu$ l of each dilution was spotted onto 7H11 agar without aTc and with  
685 200 ng/ml aTc to induce CRISPRi/ dCas9 and the sgRNA in those strains that carried the  
686 guide. Two biological replicates were carried out.

687

688

## 689   **References**

- 690   1.     Malone KM, Gordon S V. "Mycobacterium tuberculosis complex members adapted to wild  
691         and domestic animals," in *Advances in Experimental Medicine and Biology* (Springer New  
692         York LLC), 135–154. doi:10.1007/978-3-319-64371-7\_7
- 693   2.     WHO. WHO | Global tuberculosis report 2019. *World Heal Organ* (2020)  
694         doi:10.1037//0033-2909.126.1.78
- 695   3.     Fao. Roadmap for zoonotic tuberculosis. *WHO* (2017) Available at: [www.who.int](http://www.who.int)  
696         [Accessed May 11, 2020]
- 697   4.     Camus JC, Pryor MJ, Médigue C, Cole ST. Re-annotation of the genome sequence of  
698         Mycobacterium tuberculosis H37Rv. *Microbiology* (2002) **148**:2967–2973.  
699         doi:10.1099/00221287-148-10-2967
- 700   5.     Cole ST, Brosch R, Parkhill J, Garnier T, Churcher C, Harris D, Gordon S V., Eiglmeier K,  
701         Gas S, Barry CE, et al. Deciphering the biology of mycobacterium tuberculosis from the  
702         complete genome sequence. *Nature* (1998) **393**:537–544. doi:10.1038/31159
- 703   6.     Malone KM, Farrell D, Stuber TP, Schubert OT, Aebbersold R, Robbe-Austerman S, Gordon  
704         S V. Updated reference genome sequence and annotation of mycobacterium bovis  
705         AF2122/97. *Genome Announc* (2017) **5**: doi:10.1128/genomeA.00157-17
- 706   7.     Garnier T, Eiglmeier K, Camus JC, Medina N, Mansoor H, Pryor M, Duthoy S, Grondin S,  
707         Lacroix C, Monsempe C, et al. The complete genome sequence of Mycobacterium bovis.  
708         *Proc Natl Acad Sci U S A* (2003) **100**:7877–7882. doi:10.1073/pnas.1130426100
- 709   8.     Brites D, Loiseau C, Menardo F, Borrell S, Boniotti MB, Warren R, Dippenaar A, Parsons  
710         SDC, Beisel C, Behr MA, et al. A new phylogenetic framework for the animal-adapted  
711         mycobacterium tuberculosis complex. *Front Microbiol* (2018) **9**:2820.  
712         doi:10.3389/fmicb.2018.02820
- 713   9.     Golby P, Hatch KA, Bacon J, Cooney R, Riley P, Allnutt J, Hinds J, Nunez J, Marsh PD,  
714         Hewinson RG, et al. Comparative transcriptomics reveals key gene expression differences  
715         between the human and bovine pathogens of the Mycobacterium tuberculosis complex.  
716         *Microbiology* (2007) **153**:3323–3336. doi:10.1099/mic.0.2007/009894-0
- 717  10.    Rehren G, Walters S, Fontan P, Smith I, Zárraga AM. Differential gene expression between  
718         Mycobacterium bovis and Mycobacterium tuberculosis. *Tuberculosis* (2007) **87**:347–359.  
719         doi:10.1016/j.tube.2007.02.004

- 720 11. Malone KM, Rue-Albrecht K, Magee DA, Conlon K, Schubert OT, Nalpas NC, Browne JA,  
721 Smyth A, Gormley E, Aebersold R, et al. Comparative 'omics analyses differentiate  
722 mycobacterium tuberculosis and mycobacterium bovis and reveal distinct macrophage  
723 responses to infection with the human and bovine tubercle bacilli. *Microb Genomics*  
724 (2018) **4**: doi:10.1099/mgen.0.000163
- 725 12. Saïd-Salim B, Mostowy S, Kristof AS, Behr MA. Mutations in Mycobacterium tuberculosis  
726 Rv0444c, the gene encoding anti-SigK, explain high level expression of MPB70 and  
727 MPB83 in Mycobacterium bovis. *Mol Microbiol* (2006) **62**:1251–1263.  
728 doi:10.1111/j.1365-2958.2006.05455.x
- 729 13. Wiker HG. MPB70 and MPB83 - Major antigens of mycobacterium bovis. *Scand J Immunol*  
730 (2009) **69**:492–499. doi:10.1111/j.1365-3083.2009.02256.x
- 731 14. Queval CJ, Fearn A, Botella L, Smyth A, Schnettger L, Mitermite M, Wooff E, Villarreal-  
732 Ramos B, Garcia-Jimenez W, Heunis T, et al. Macrophage-specific responses to  
733 human and animal-adapted tubercle bacilli reveal pathogen and host factors driving  
734 multinucleated cell formation. *PLoS Pathog* (2021) **17**:e1009410.  
735 doi:10.1371/journal.ppat.1009410
- 736 15. Bigi MM, Blanco FC, Araújo FR, Thacker TC, Zumárraga MJ, Cataldi AA, Soria MA, Bigi F.  
737 Polymorphisms of 20 regulatory proteins between Mycobacterium tuberculosis and  
738 Mycobacterium bovis. *Microbiol Immunol* (2016) **60**:552–560. doi:10.1111/1348-  
739 0421.12402
- 740 16. García EA, Blanco FC, Klepp LI, Pazos A, McNeil MR, Jackson M, Bigi F. Role of PhoPR in  
741 the response to stress of Mycobacterium bovis. *Comp Immunol Microbiol Infect Dis* (2021)  
742 **74**:101593. doi:10.1016/j.cimid.2020.101593
- 743 17. Broset E, Martín C, Gonzalo-Asensio J. Evolutionary landscape of the mycobacterium  
744 tuberculosis complex from the viewpoint of phoPR: Implications for virulence regulation  
745 and application to vaccine development. *MBio* (2015) **6**: doi:10.1128/mBio.01289-15
- 746 18. Sohaskey CD, Modesti L. Differences in nitrate reduction between mycobacterium  
747 tuberculosis and mycobacterium bovis are due to differential expression of both narGHJI  
748 and narK2. *FEMS Microbiol Lett* (2009) **290**:129–134. doi:10.1111/j.1574-  
749 6968.2008.01424.x
- 750 19. Sassetti CM, Boyd DH, Rubin EJ. Comprehensive identification of conditionally essential  
751 genes in mycobacteria. *Proc Natl Acad Sci U S A* (2001) **98**:12712–12717.  
752 doi:10.1073/pnas.231275498

- 753 20. Rengarajan J, Bloom BR, Rubin EJ. Genome-wide requirements for Mycobacterium  
754 tuberculosis adaptation and survival in macrophages. *Proc Natl Acad Sci U S A* (2005)  
755 **102**:8327–8332. doi:10.1073/pnas.0503272102
- 756 21. Minato Y, Gohl DM, Thiede JM, Chacón JM, Harcombe WR, Maruyama F, Baughn AD.  
757 Genomewide Assessment of Mycobacterium tuberculosis Conditionally Essential  
758 Metabolic Pathways. *mSystems* (2019) **4**: doi:10.1128/MSYSTEMS.00070-19
- 759 22. Griffin JE, Gawronski JD, Dejesus MA, Ioerger TR, Akerley BJ, Sasseti CM. High-resolution  
760 phenotypic profiling defines genes essential for mycobacterial growth and cholesterol  
761 catabolism. *PLoS Pathog* (2011) **7**:e1002251. doi:10.1371/journal.ppat.1002251
- 762 23. Dejesus MA, Gerrick ER, Xu W, Park SW, Long JE, Boutte CC, Rubin EJ, Schnappinger D,  
763 Ehrt S, Fortune SM, et al. Comprehensive essentiality analysis of the Mycobacterium  
764 tuberculosis genome via saturating transposon mutagenesis. *MBio* (2017) **8**:  
765 doi:10.1128/mBio.02133-16
- 766 24. Zhang YJ, Ioerger TR, Huttenhower C, Long JE, Sasseti CM, Sacchettini JC, Rubin EJ. Global  
767 assessment of genomic regions required for growth in Mycobacterium tuberculosis. *PLoS*  
768 *Pathog* (2012) **8**:e1002946. doi:10.1371/journal.ppat.1002946
- 769 25. Carey AF, Rock JM, Krieger I V., Chase MR, Fernandez-Suarez M, Gagneux S, Sacchettini JC,  
770 Ioerger TR, Fortune SM. TnSeq of Mycobacterium tuberculosis clinical isolates reveals  
771 strain-specific antibiotic liabilities. *PLoS Pathog* (2018) **14**:e1006939.  
772 doi:10.1371/journal.ppat.1006939
- 773 26. Butler RE, Smith AA, Mendum TA, Chandran A, Wu H, Lefrançois L, Chambers M, Soldati  
774 T, Stewart GR. Mycobacterium bovis uses the ESX-1 Type VII secretion system to escape  
775 predation by the soil-dwelling amoeba Dictyostelium discoideum. (2020) **14**:919–930.  
776 doi:10.1038/s41396-019-0572-z
- 777 27. Gallagher J, Horwill DM. A selective oleic acid albumin agar medium for the cultivation of  
778 Mycobacterium bovis. *J Hyg (Lond)* (1977) **79**:155–60.  
779 doi:10.1017/s0022172400052943
- 780 28. Majumdar G, Mbau R, Singh V, Warner DF, Dragset MS, Mukherjee R. “Genome-Wide  
781 Transposon Mutagenesis in Mycobacterium tuberculosis and Mycobacterium  
782 smegmatis,” in *Methods in molecular biology (Clifton, N.J.)*, 321–335. doi:10.1007/978-1-  
783 4939-6472-7\_21
- 784 29. Long JE, DeJesus M, Ward D, Baker RE, Ioerger T, Sasseti CM. “Identifying Essential

- 785 Genes in Mycobacterium tuberculosis by Global Phenotypic Profiling,” in (Humana Press,  
786 New York, NY), 79–95. doi:10.1007/978-1-4939-2398-4\_6
- 787 30. Belisle JT, Sonnenberg MG. Isolation of genomic DNA from mycobacteria. *Methods Mol*  
788 *Biol* (1998) **101**:31–44. doi:10.1385/0-89603-471-2:31
- 789 31. DeJesus MA, Ioerger TR. A Hidden Markov Model for identifying essential and growth-  
790 defect regions in bacterial genomes from transposon insertion sequencing data. *BMC*  
791 *Bioinformatics* (2013) **14**: doi:10.1186/1471-2105-14-303
- 792 32. Singh AK, Carette X, Potluri LP, Sharp JD, Xu R, Pristic S, Husson RN. Investigating essential  
793 gene function in Mycobacterium tuberculosis using an efficient CRISPR interference  
794 system. *Nucleic Acids Res* (2016) **44**:e143–e143. doi:10.1093/nar/gkw625
- 795 33. Larson MH, Gilbert LA, Wang X, Lim WA, Weissman JS, Qi LS. CRISPR interference  
796 (CRISPRi) for sequence-specific control of gene expression. *Nat Protoc* (2013) **8**:2180–  
797 2196. doi:10.1038/nprot.2013.132
- 798 34. M Z. Mfold web server for nucleic acid folding and hybridization prediction. *Nucleic Acids*  
799 *Res* (2003) **31**:3406–3415. doi:10.1093/NAR/GKG595
- 800 35. Altschul SF, Gish W, Miller W, Myers EW, Lipman DJ. Basic local alignment search tool. *J*  
801 *Mol Biol* (1990) **215**:403–410. doi:10.1016/S0022-2836(05)80360-2
- 802 36. Choudhary E, Thakur P, Pareek M, Agarwal N. Gene silencing by CRISPR interference in  
803 mycobacteria. *Nat Commun* (2015) **6**: doi:10.1038/ncomms7267
- 804 37. Rustad TR, Roberts DM, Liao RP, Sherman DR. Isolation of mycobacterial RNA. *Methods*  
805 *Mol Biol* (2008) **465**:13–22. doi:10.1007/978-1-59745-207-6\_2
- 806 38. Livak KJ, Schmittgen TD. Analysis of relative gene expression data using real-time  
807 quantitative PCR and the 2- $\Delta\Delta$ CT method. *Methods* (2001) **25**:402–408.  
808 doi:10.1006/meth.2001.1262
- 809 39. Serafini A, Tan L, Horswell S, Howell S, Greenwood DJ, Hunt DM, Phan M, Schembri M,  
810 Monteleone M, Montague CR, et al. *Mycobacterium tuberculosis* requires glyoxylate shunt  
811 and reverse methylcitrate cycle for lactate and pyruvate metabolism. *Mol Microbiol*  
812 (2019) **112**:1284–1307. doi:10.1111/mmi.14362
- 813 40. Butler RE, Smith AA, Mendum TA, Chandran A, Wu H, Lefrançois L, Chambers M, Soldati  
814 T, Stewart GR. Mycobacterium bovis uses the ESX-1 Type VII secretion system to escape  
815 predation by the soil-dwelling amoeba Dictyostelium discoideum. *ISME J* 2020 144

- 816 (2020) **14**:919–930. doi:10.1038/s41396-019-0572-z
- 817 41. Keating LA, Wheeler PR, Mansoor H, Inwald JK, Dale J, Hewinson RG, Gordon S V. The  
818 pyruvate requirement of some members of the Mycobacterium tuberculosis complex is  
819 due to an inactive pyruvate kinase: implications for in vivo growth. *Mol Microbiol* (2005)  
820 **56**:163–174. doi:10.1111/J.1365-2958.2005.04524.X
- 821 42. Gonzalo-Asensio J, Malaga W, Pawlik A, Astarie-Dequeker C, Passemar C, Moreau F, Laval  
822 F, Daffé M, Martin C, Brosch R, et al. Evolutionary history of tuberculosis shaped by  
823 conserved mutations in the PhoPR virulence regulator. *Proc Natl Acad Sci U S A* (2014)  
824 **111**:11491–11496. doi:10.1073/pnas.1406693111
- 825 43. Pethe K, Bifani P, Jang J, Kang S, Park S, Ahn S, Jiricek J, Jung J, Jeon HK, Cechetto J, et al.  
826 Discovery of Q203, a potent clinical candidate for the treatment of tuberculosis. *Nat Med*  
827 (2013) **19**:1157–1160. doi:10.1038/nm.3262
- 828 44. Minato Y, Gohl DM, Thiede JM, Chacón JM, Harcombe WR, Maruyama F, Baughn AD.  
829 Genome-wide assessment of Mycobacterium tuberculosis conditionally essential  
830 metabolic pathways. *bioRxiv* (2019)534289. doi:10.1101/534289
- 831 45. Bosch B, DeJesus MA, Poulton NC, Zhang W, Engelhart CA, Zaveri A, Lavalette S, Ruecker  
832 N, Trujillo C, Wallach JB, et al. Genome-wide gene expression tuning reveals diverse  
833 vulnerabilities of M. tuberculosis. *Cell* (2021) doi:10.1016/j.cell.2021.06.033
- 834 46. McNeil MB, Keighley LM, Cook JR, Cheung C, Cook GM. CRISPR interference identifies  
835 vulnerable cellular pathways with bactericidal phenotypes in Mycobacterium  
836 tuberculosis. *Mol Microbiol* (2021)mmi.14790. doi:10.1111/mmi.14790
- 837 47. Martínez-Jiménez F, Papadatos G, Yang L, Wallace IM, Kumar V, Pieper U, Sali A, Brown  
838 JR, Overington JP, Marti-Renom MA. Target Prediction for an Open Access Set of  
839 Compounds Active against Mycobacterium tuberculosis. *PLoS Comput Biol* (2013)  
840 **9**:1003253. doi:10.1371/journal.pcbi.1003253
- 841 48. Gu Z, Gu L, Eils R, Schlesner M, Brors B. circlize implements and enhances circular  
842 visualization in R. *Bioinformatics* (2014) **30**:2811–2812.  
843 doi:10.1093/BIOINFORMATICS/BTU393

844



Figure 1

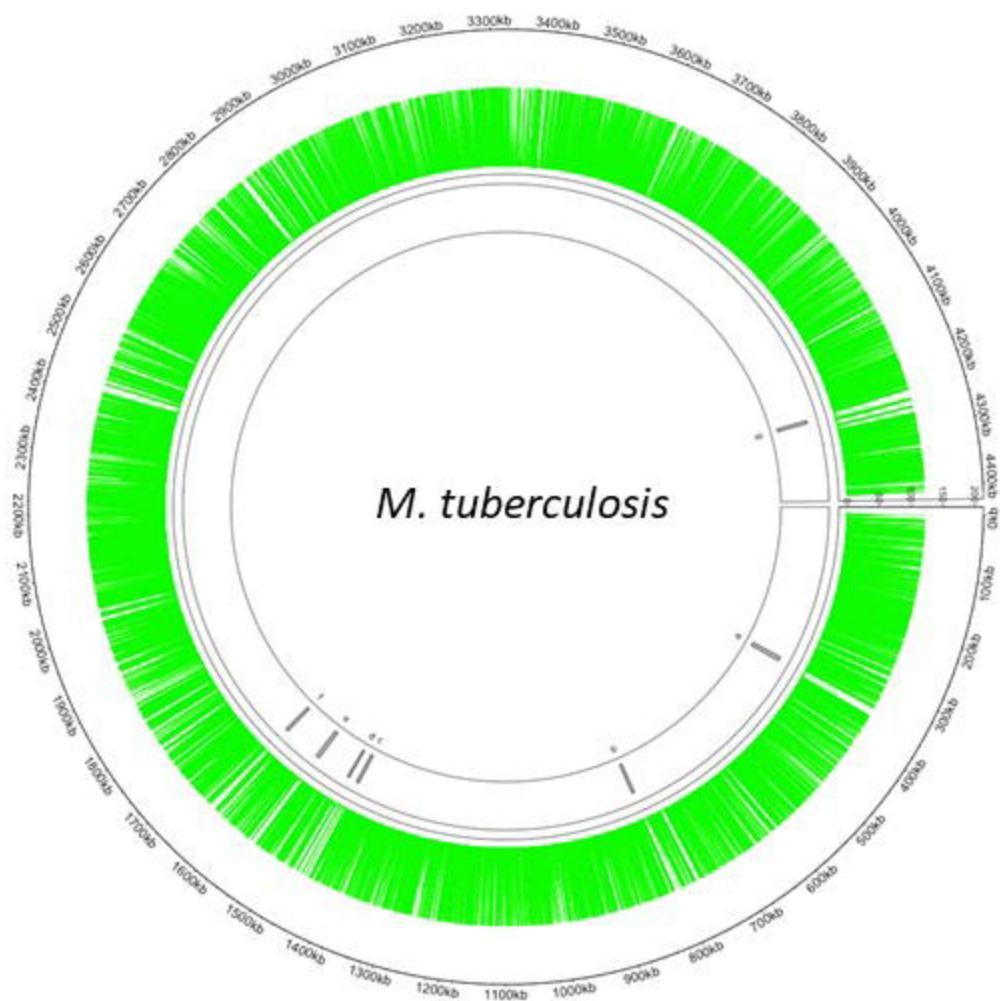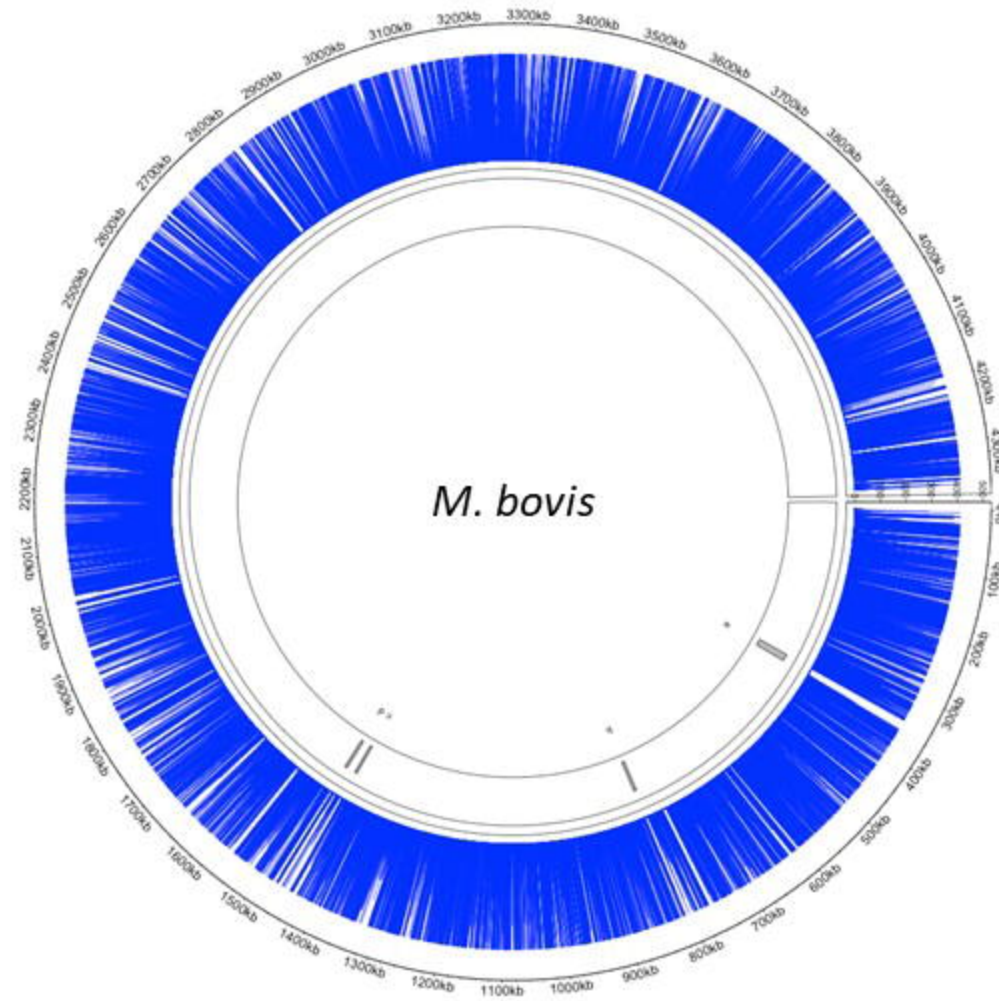

Figure 2

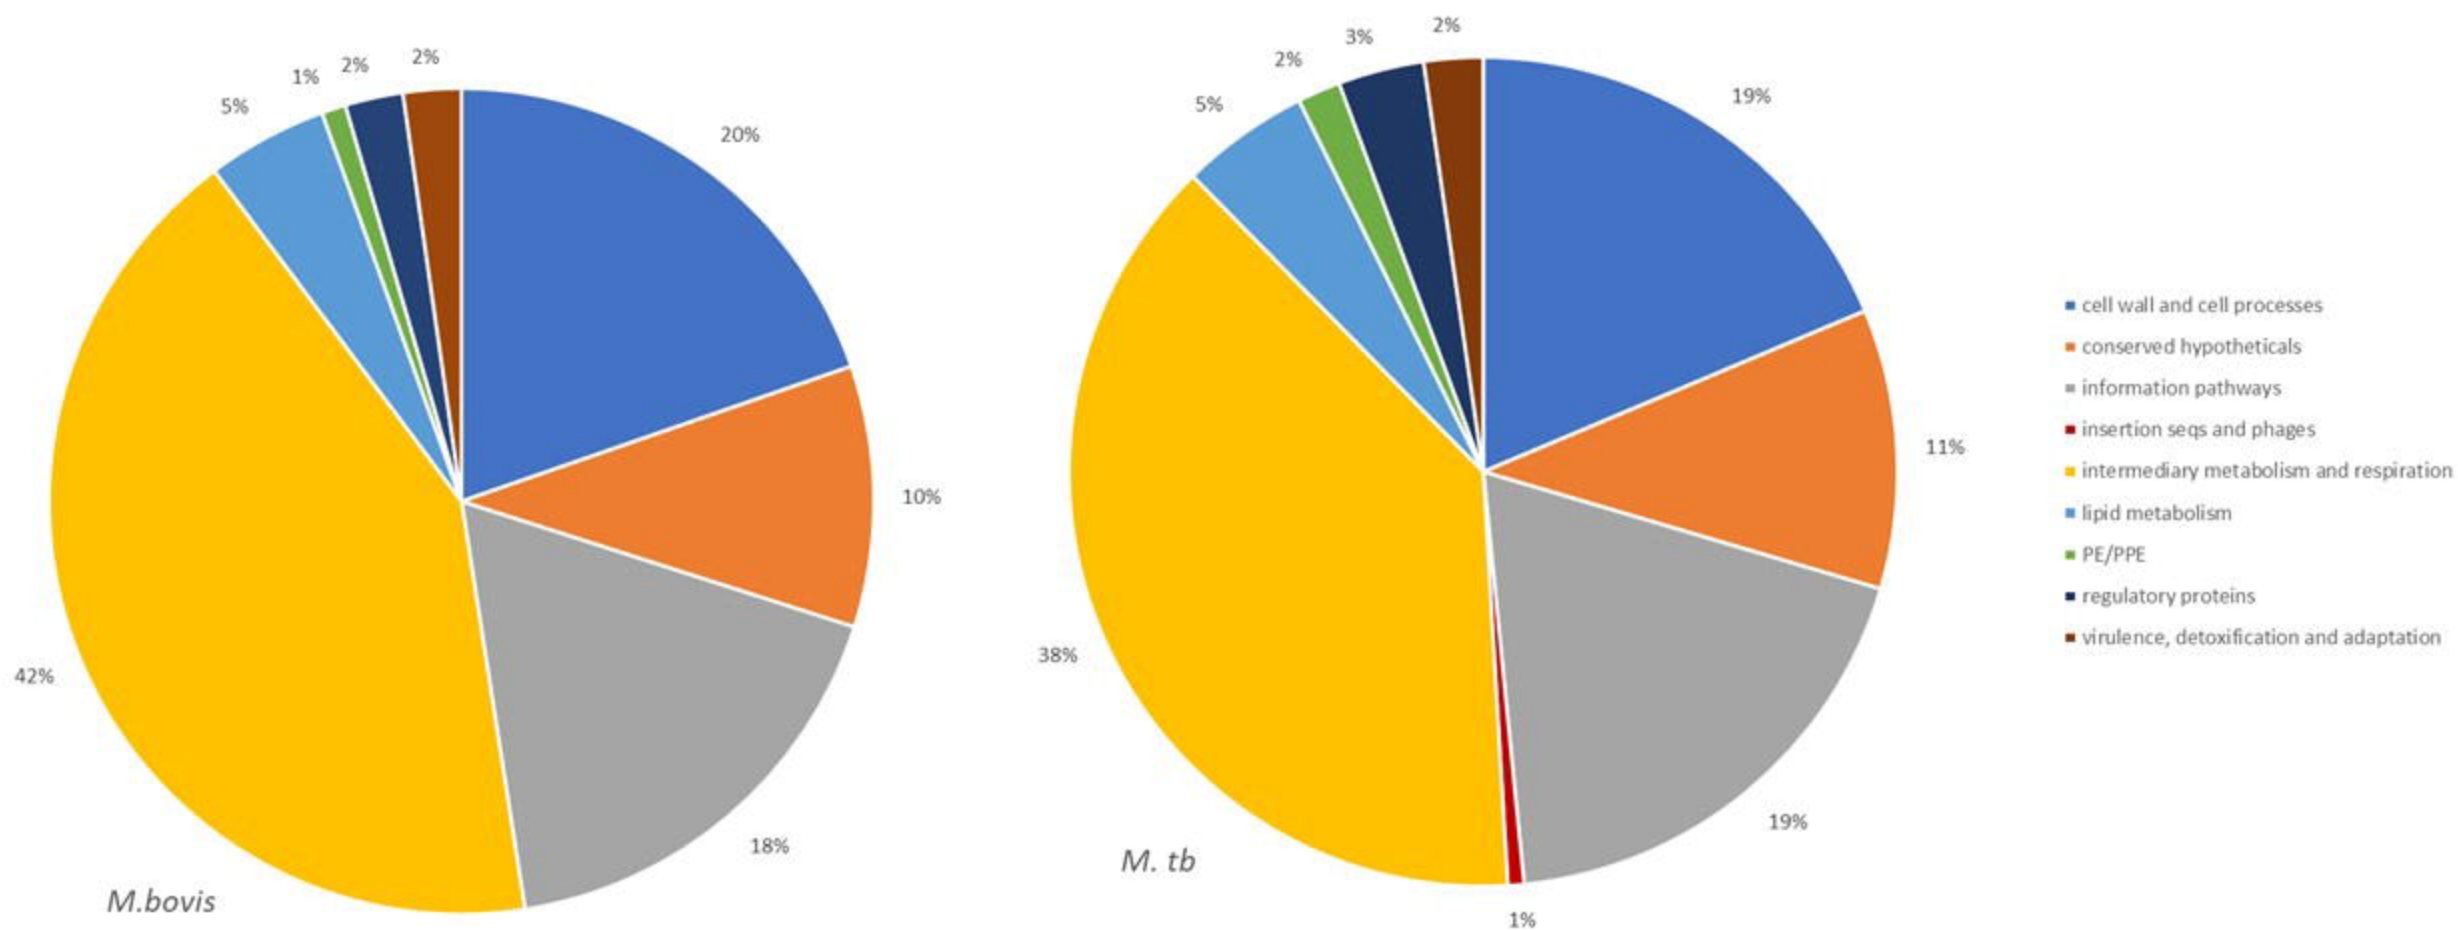

Figure 3

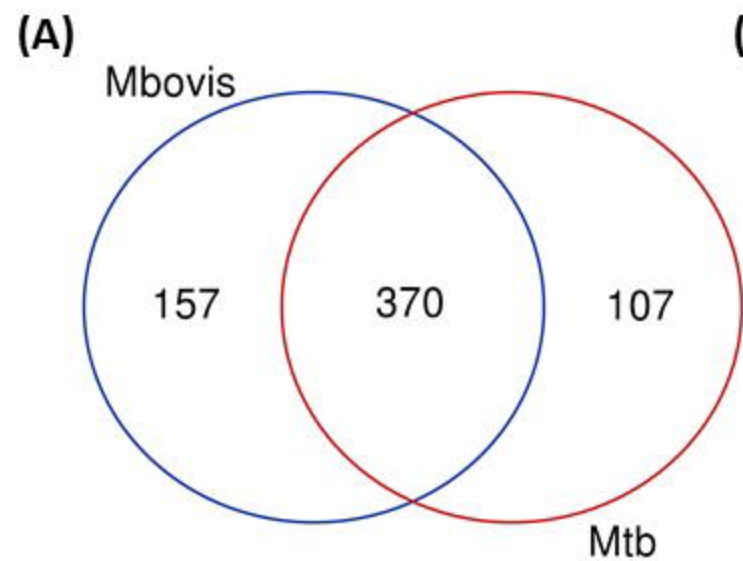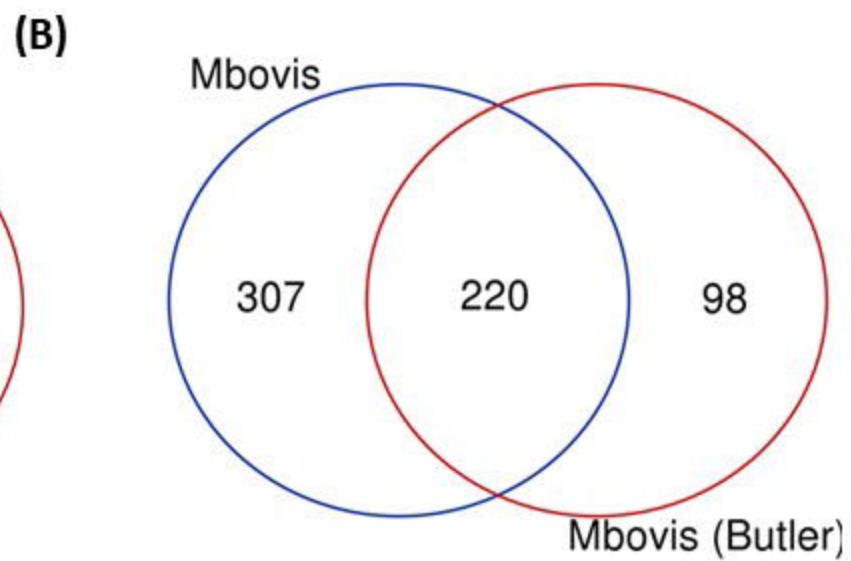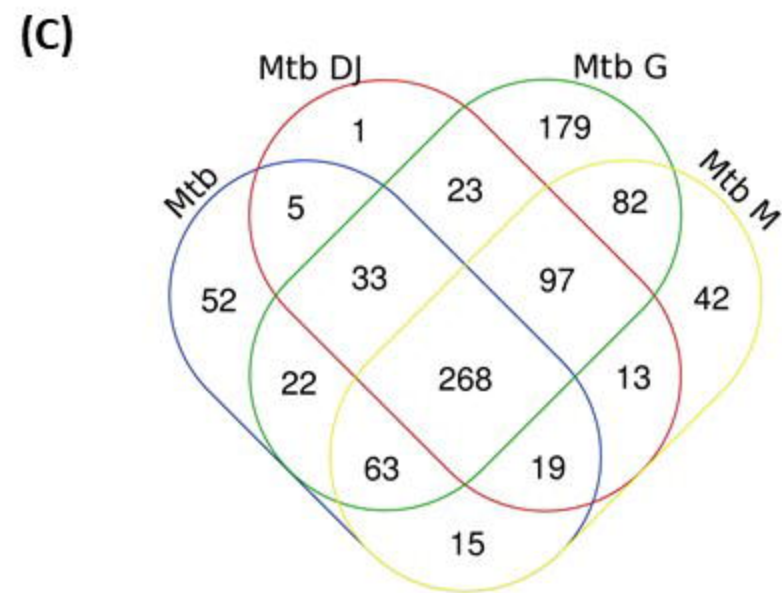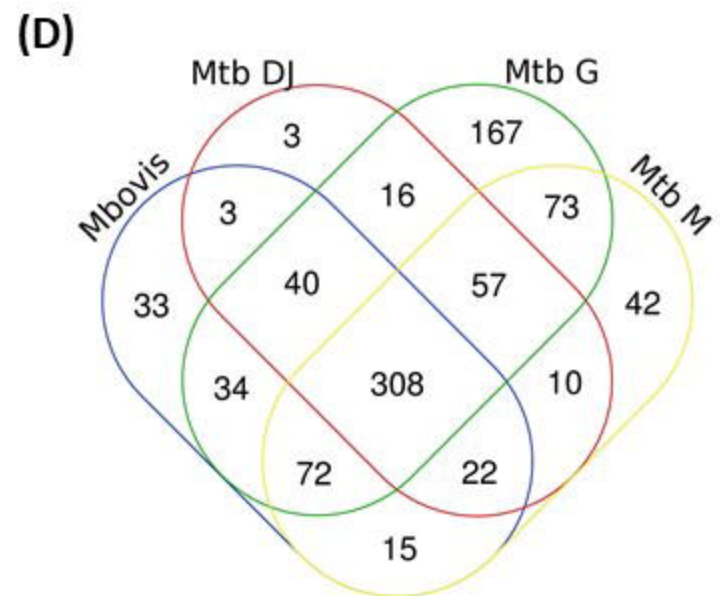

Figure 4

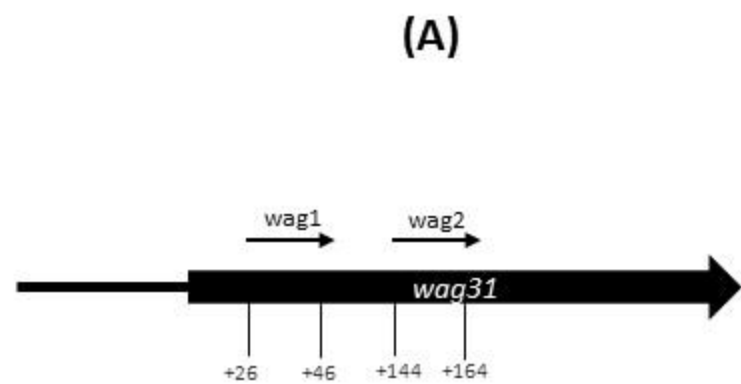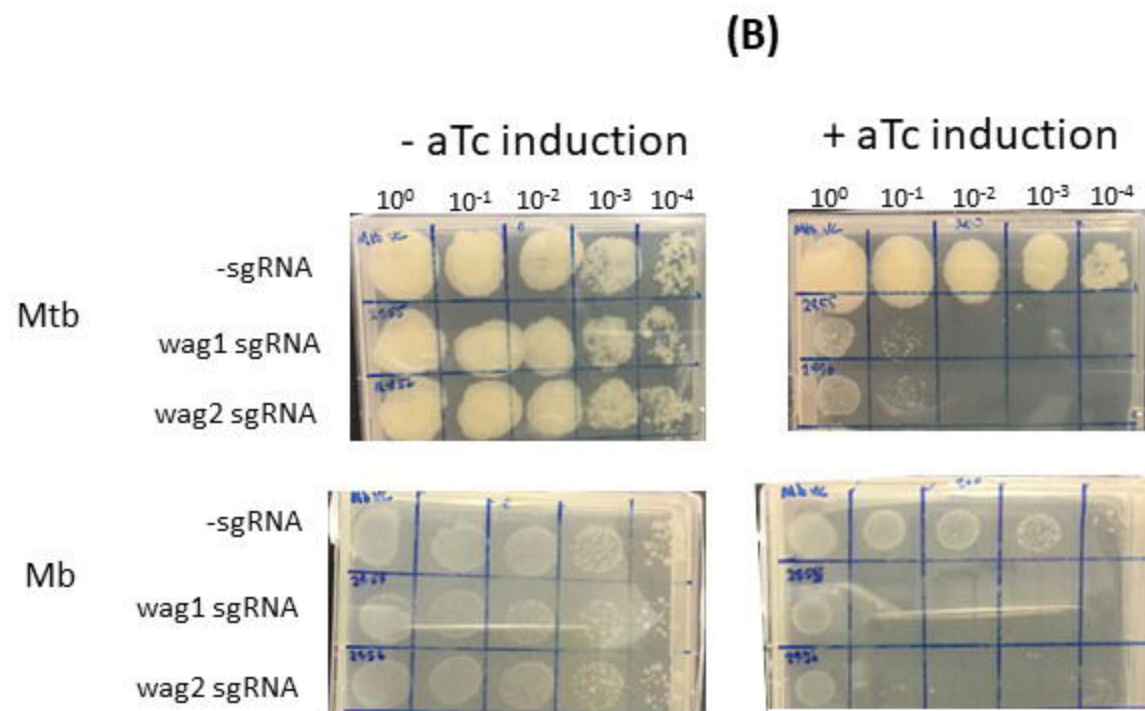

**Figure 5**

**(A)**

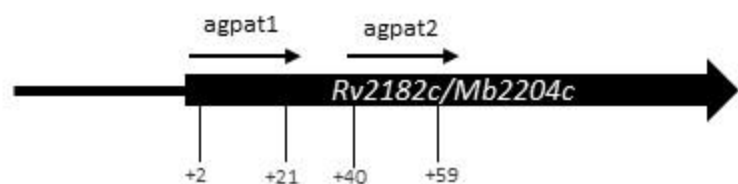

**(C)**

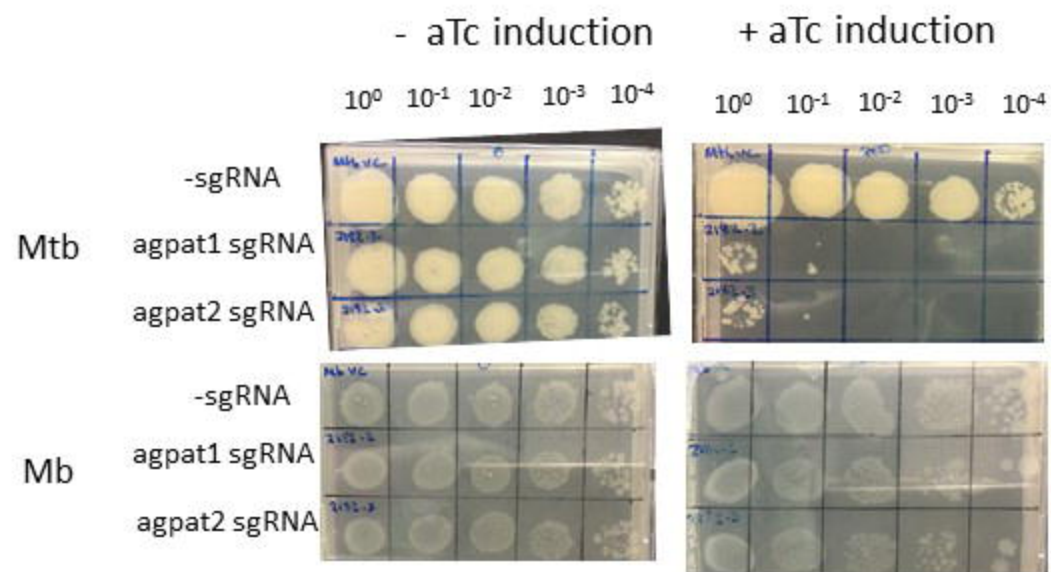

**(B)**

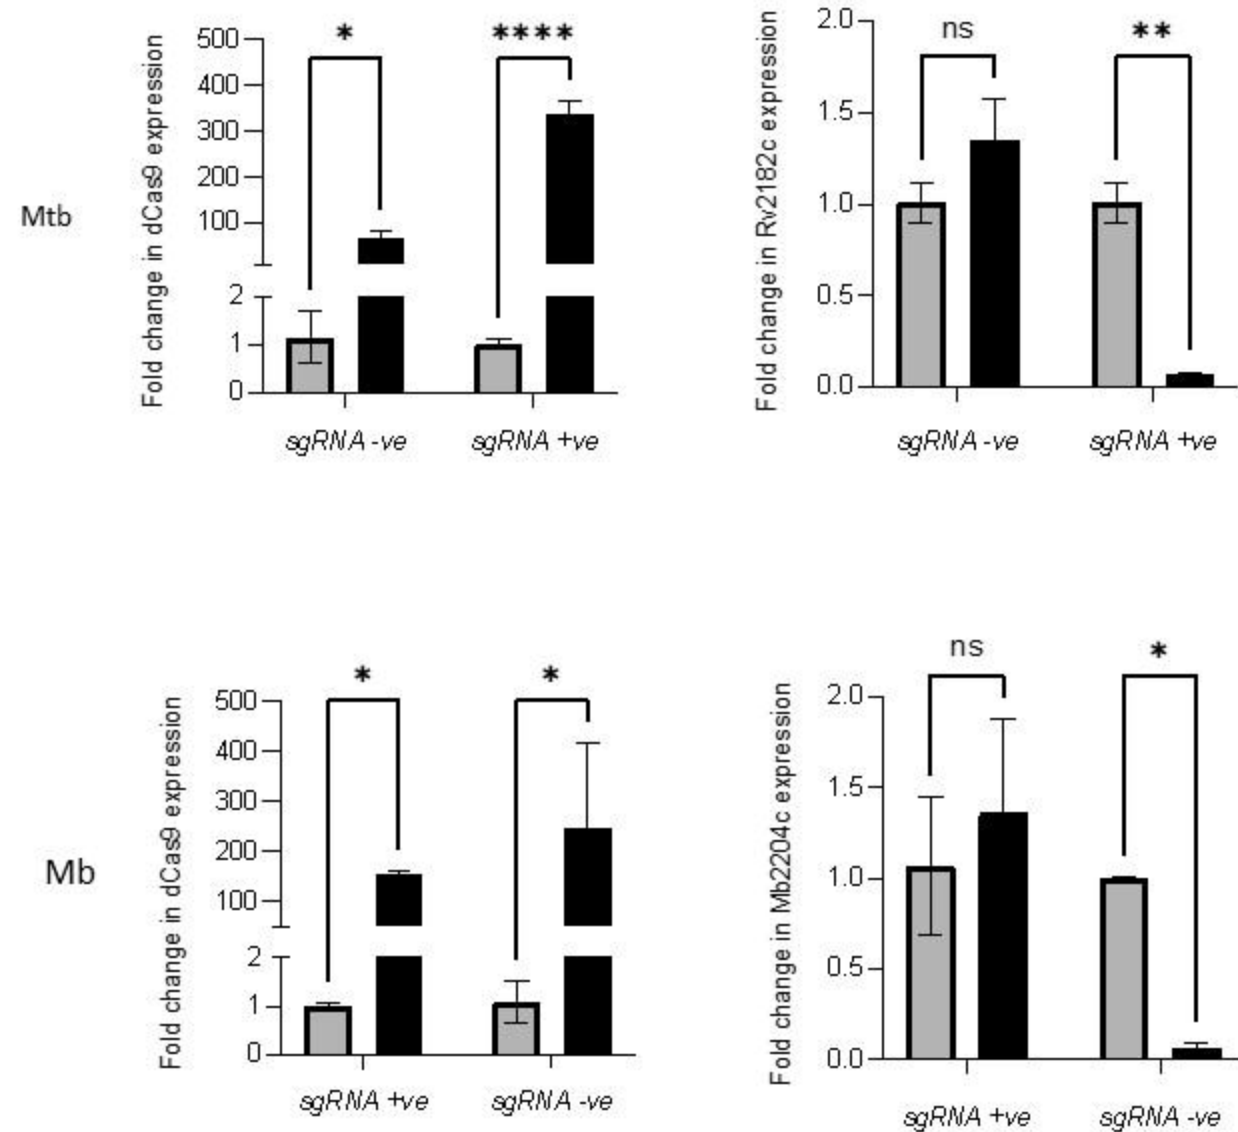

Source: http://biorxiv.org/content/10.1101/2021.09.21.461195v1.full.pdf
